# Supplementary material for: Decarboxylative substitution of β-keto acids to benzylic alcohols catalyzed by molecular iodine
Source: Royal Society of Chemistry journal article supplement (doi:10.1039/c5ob01730k), 2015-01-01

# **Decarboxylative Substitution of $\beta$ -Keto Acids to Benzylic Alcohols Catalyzed by Molecular Iodine**

**Fu-Zhong Han\*, Xin-Xin Zhang, Ming-Gang Hu and Li-Na Jia\***

*College of Chemistry and Chemical Engineering, Qiqihar University, Qiqihar 161006, China. E-mail:  
[hfgood1982@163.com](mailto:hfgood1982@163.com), [jialinachn@163.com](mailto:jialinachn@163.com)*

## **Supporting Information**

# NMR Spectra

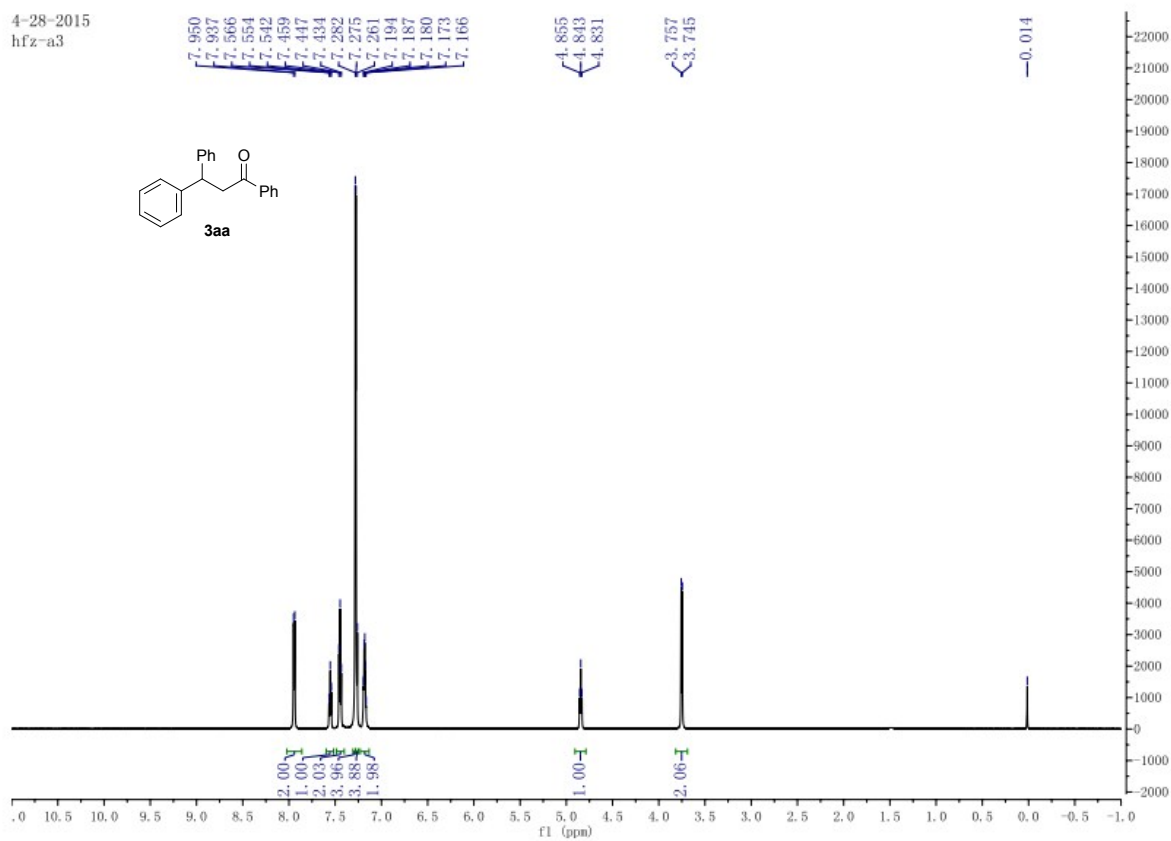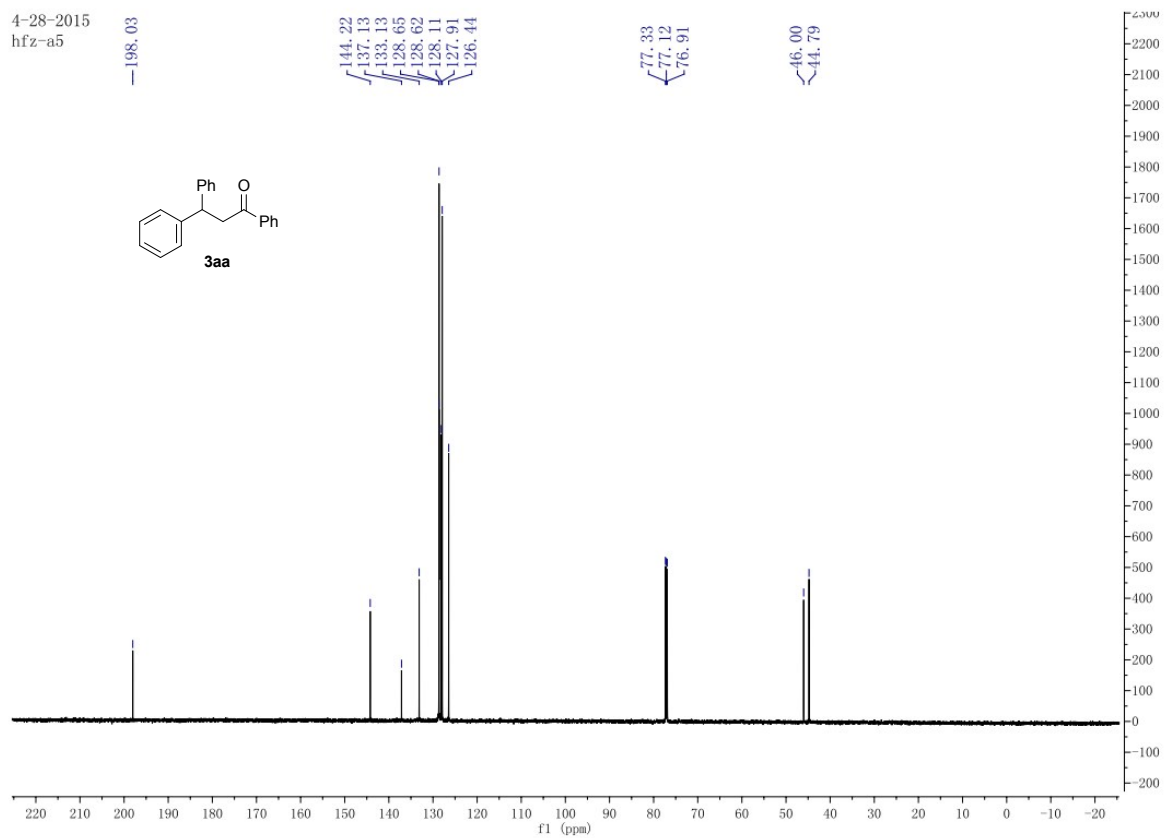

4-28-2015  
hfz-a4

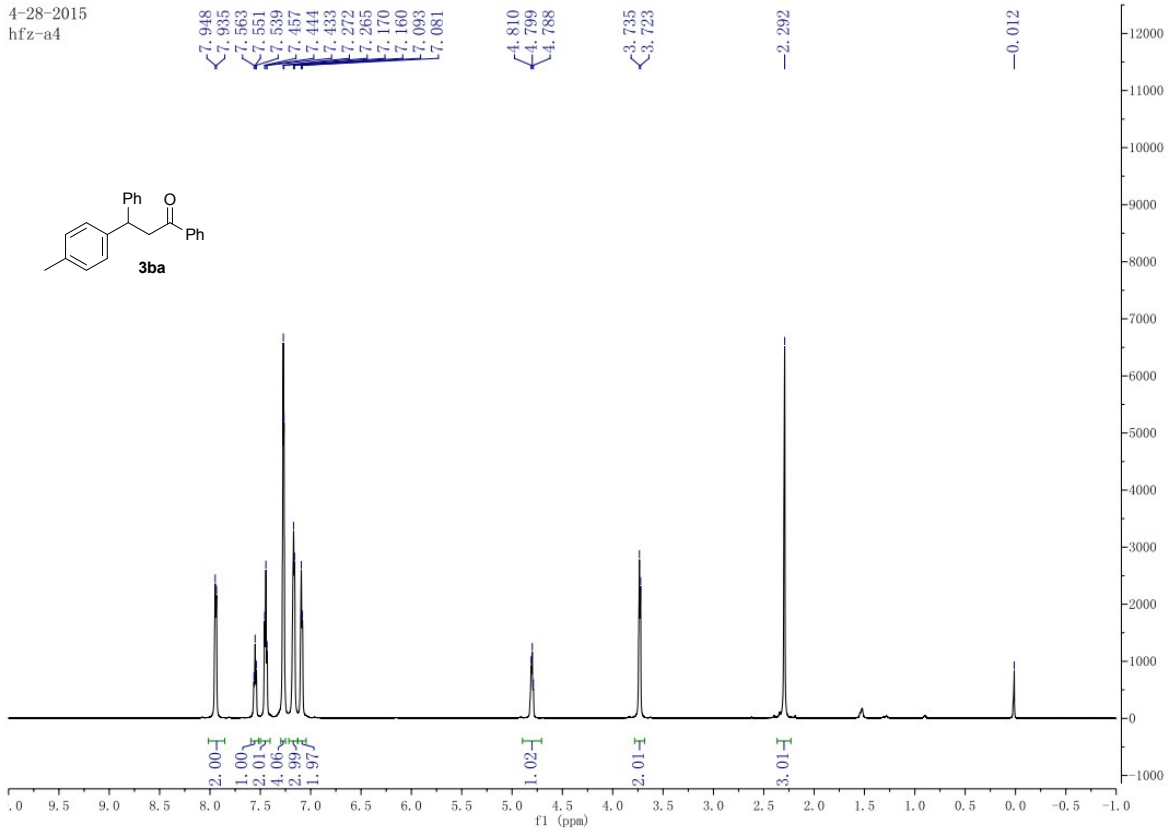

4-28-2015  
hfz-a6

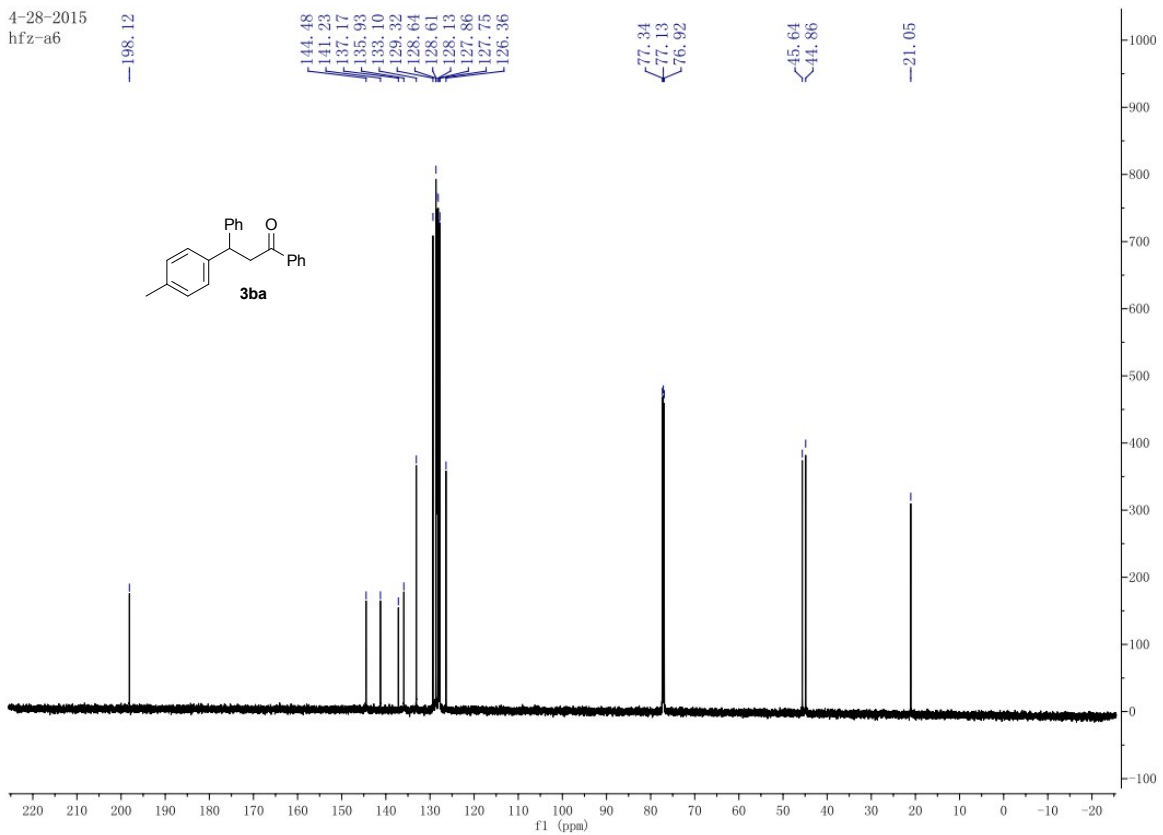

5-4-2015  
hfz-a14

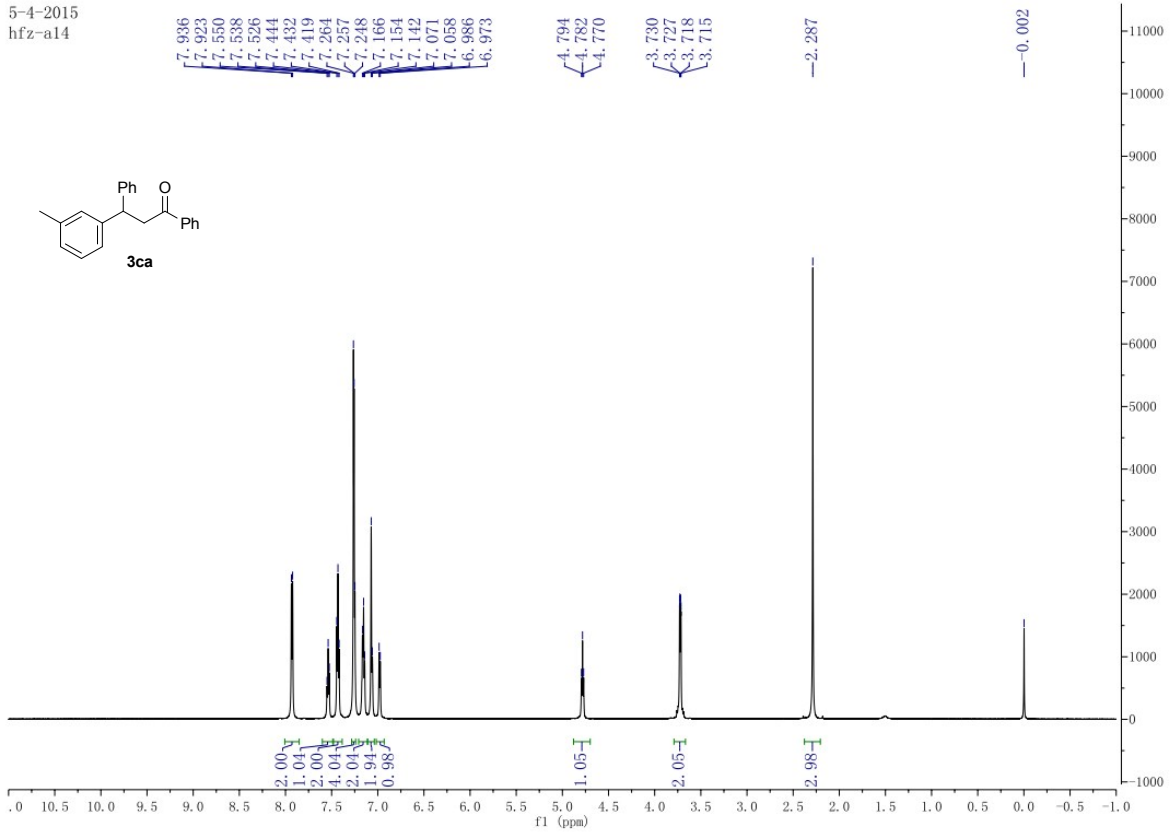

5-4-2015  
hfz-a16

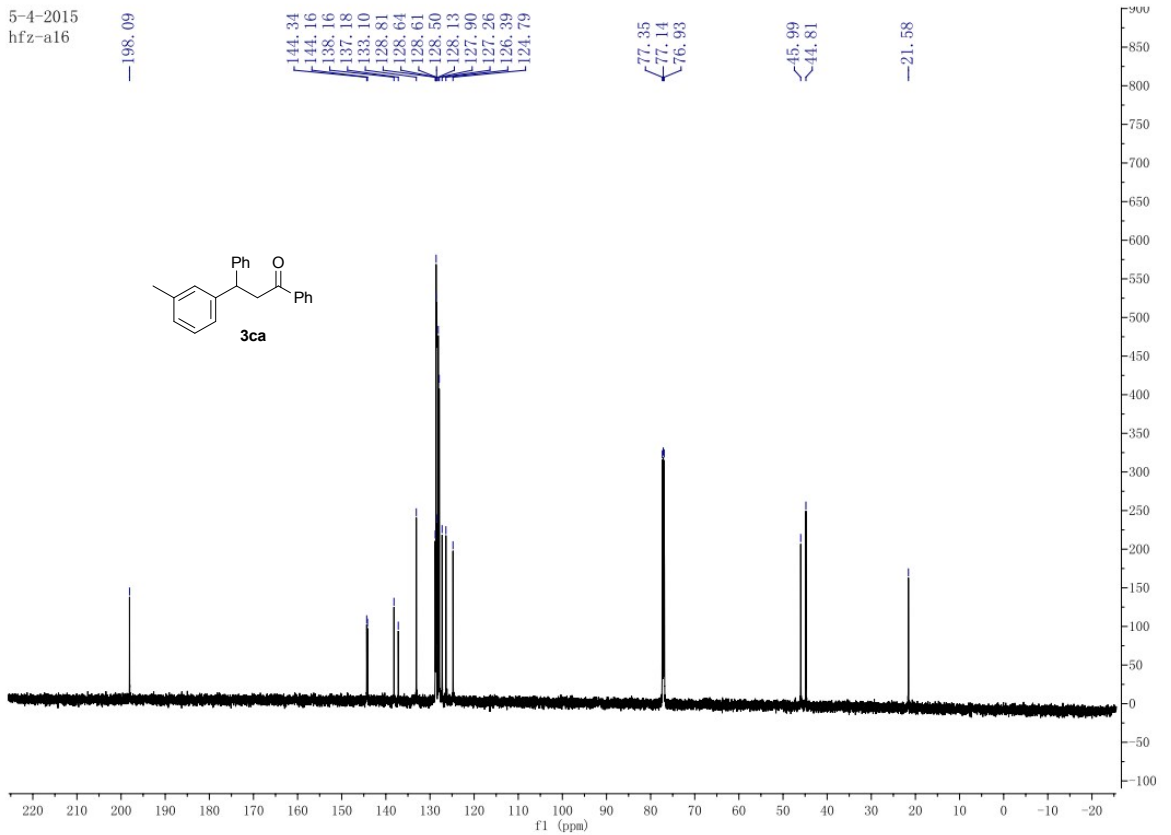

5-5-2015  
hfz-a18

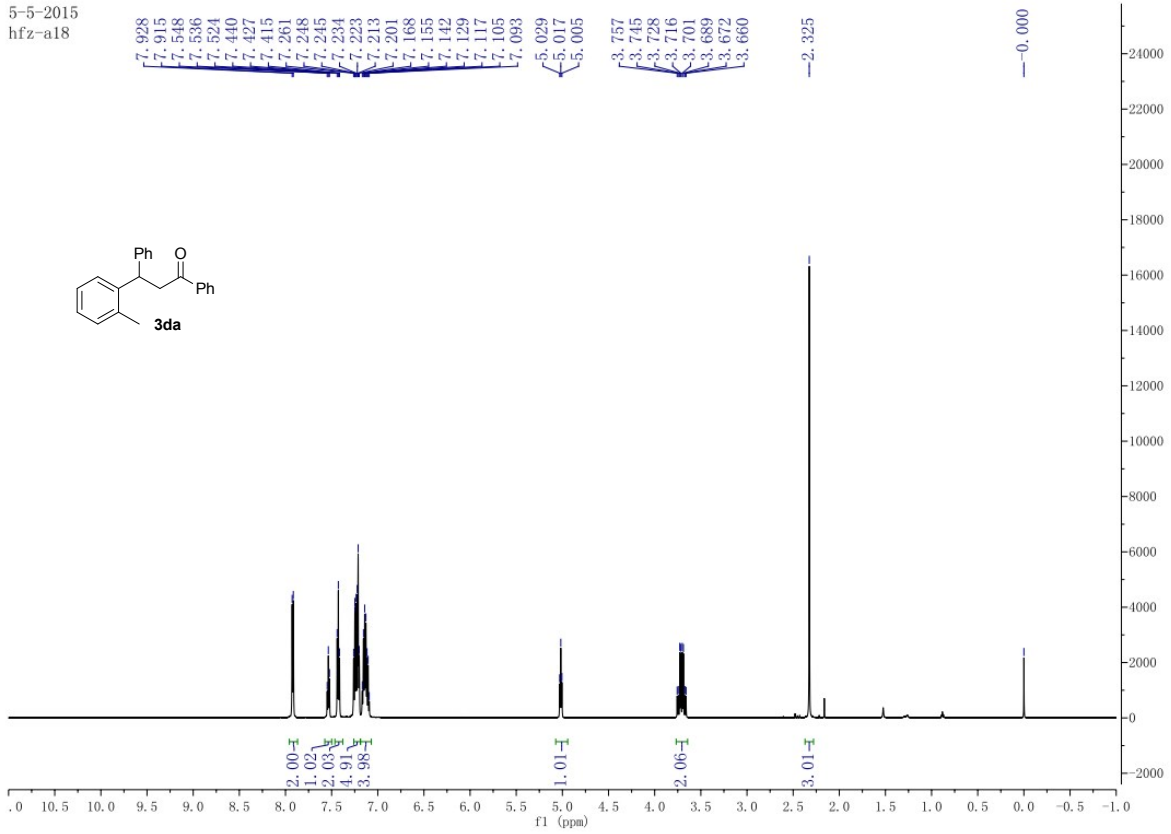

5-7-2015  
hfz-a24

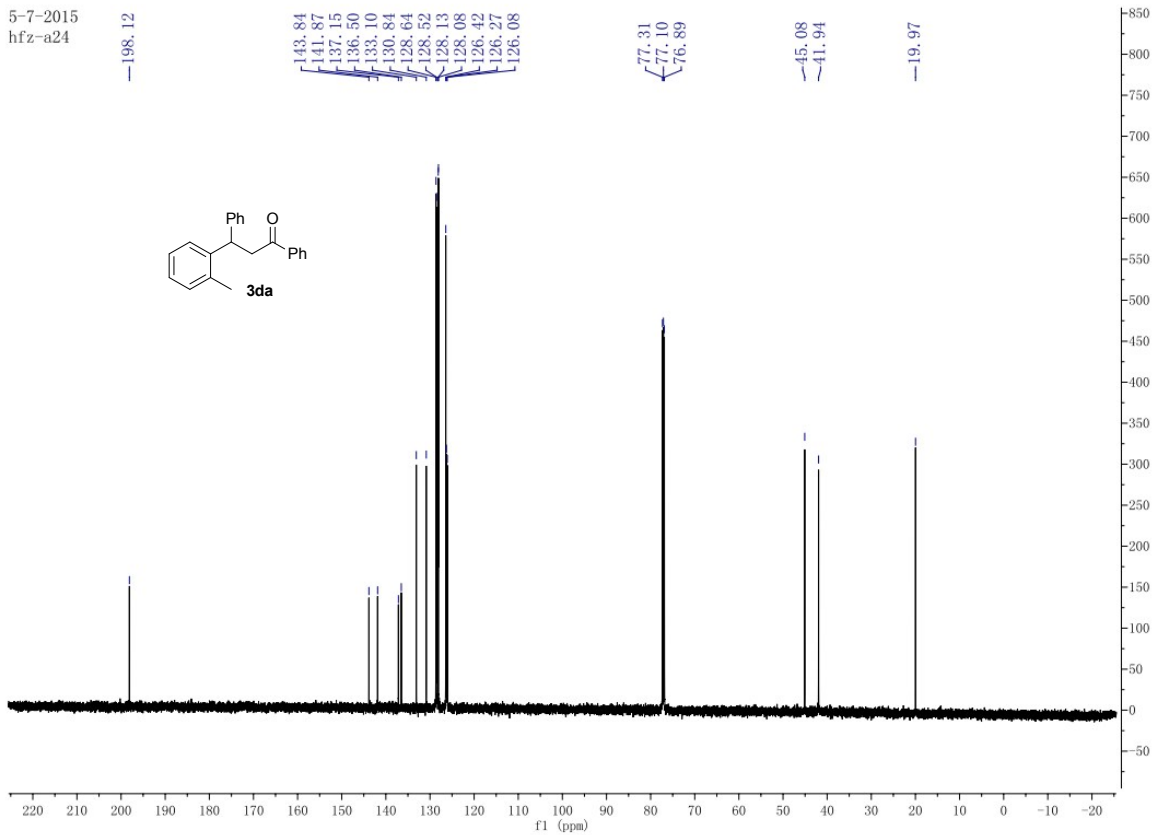

4-29-2015  
hfz-a8

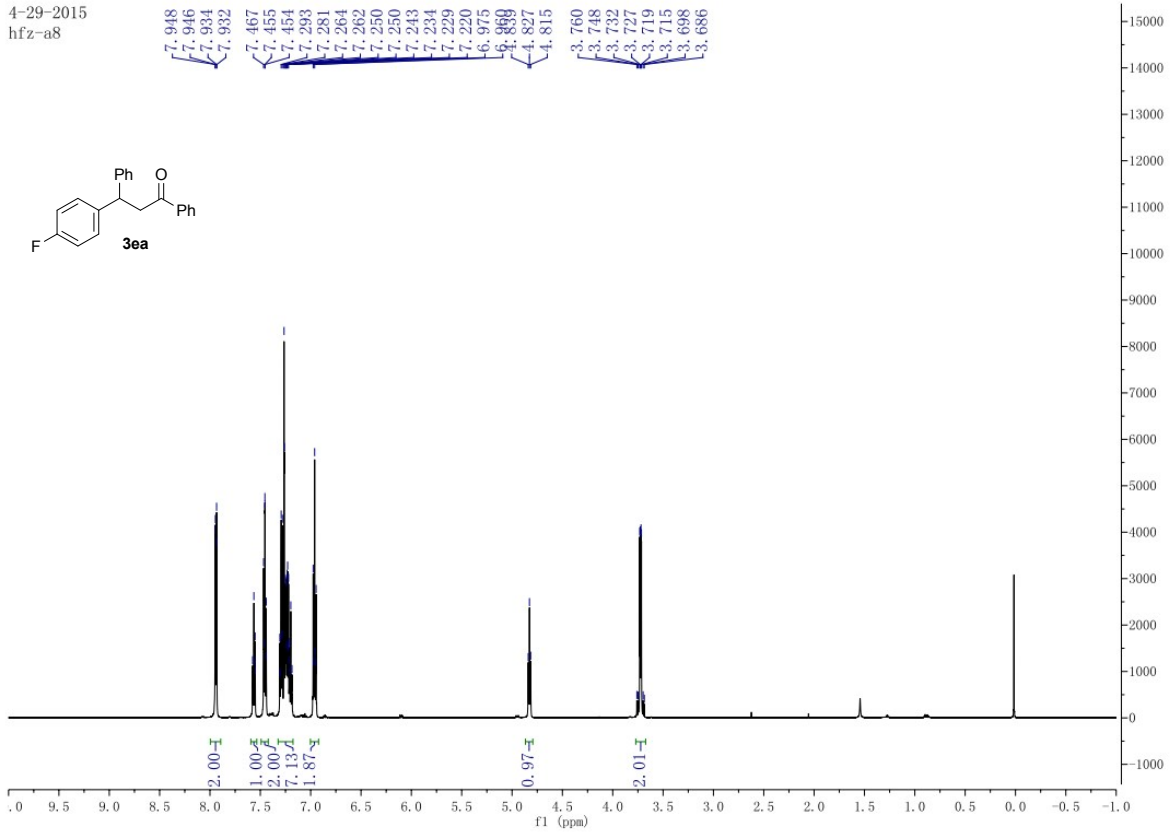

4-29-2015  
hfz-a9

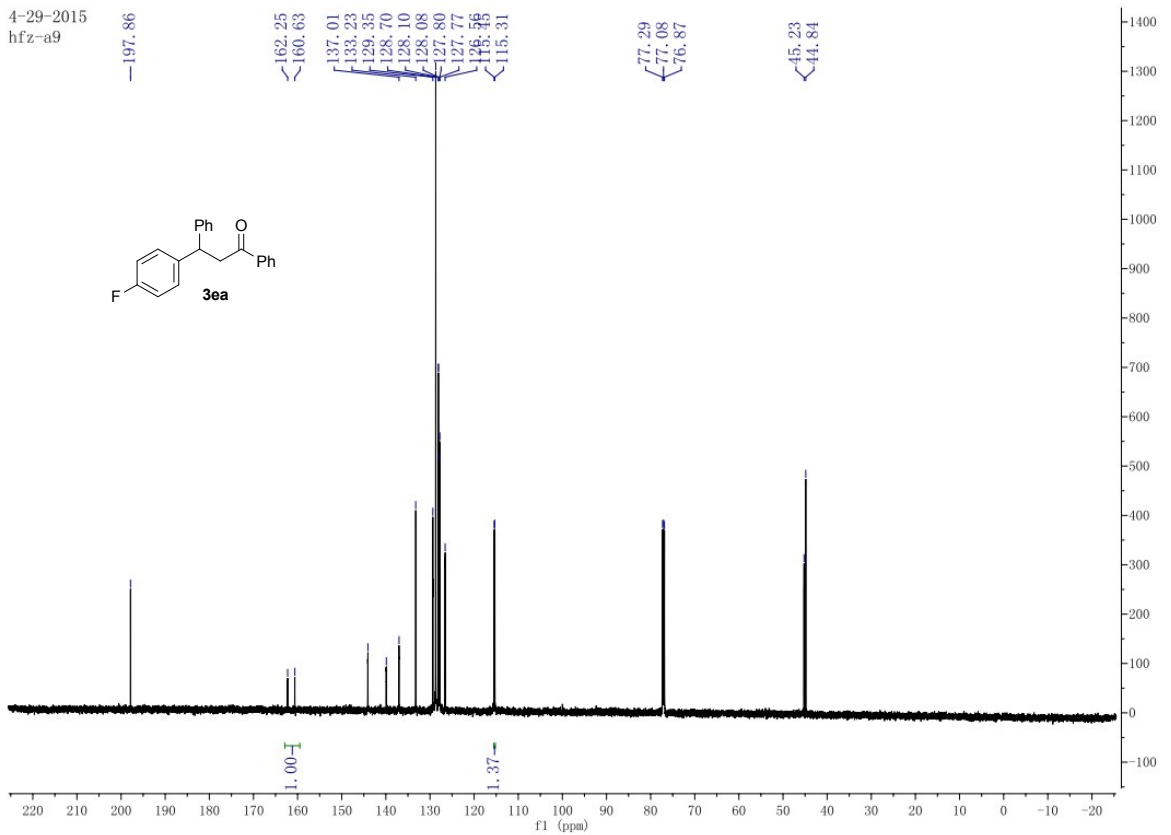

5-4-2015  
hfz-a15

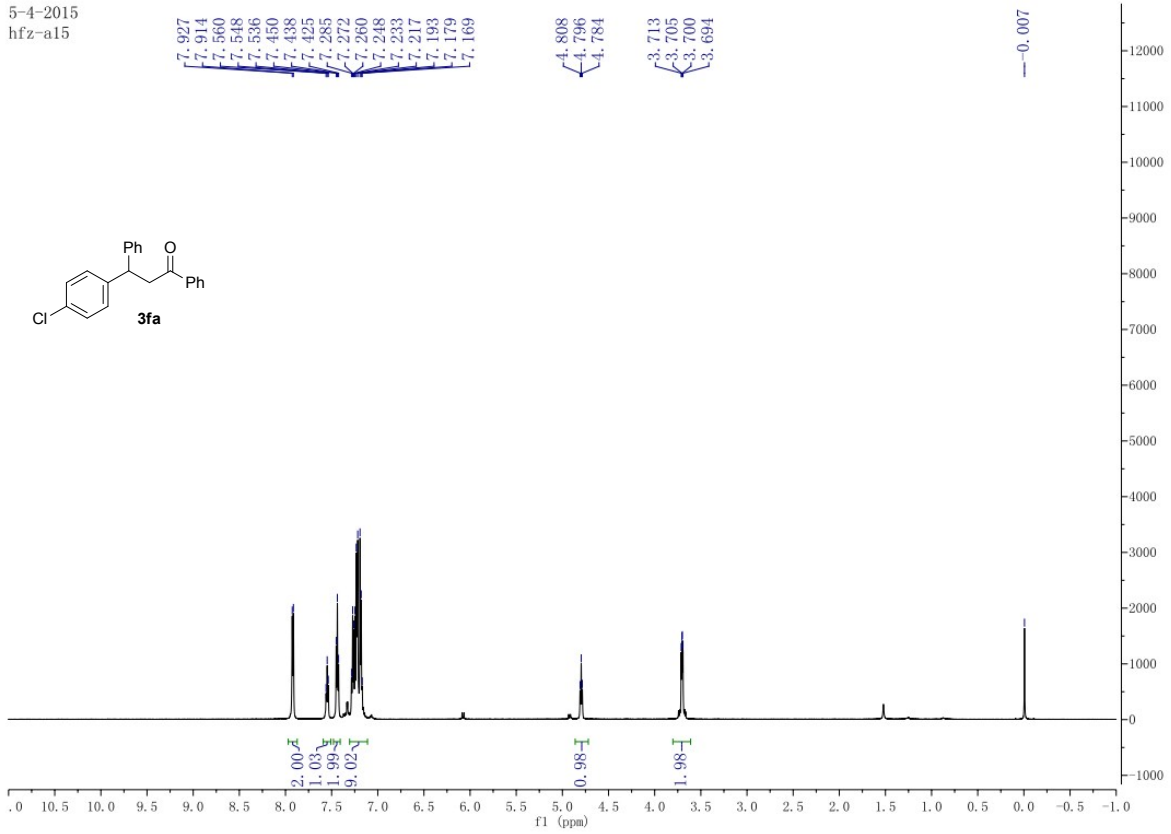

4-29-2015  
hfz-a10

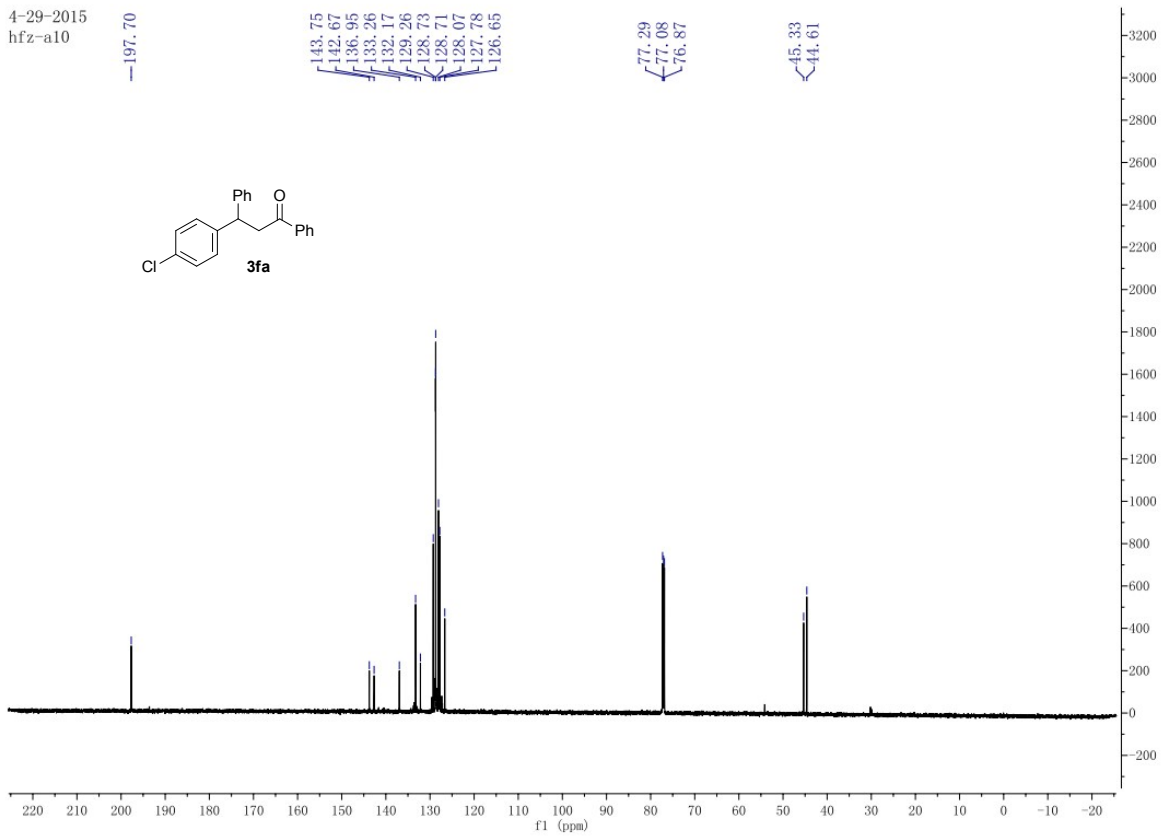

5-25-2015  
hfz-a39

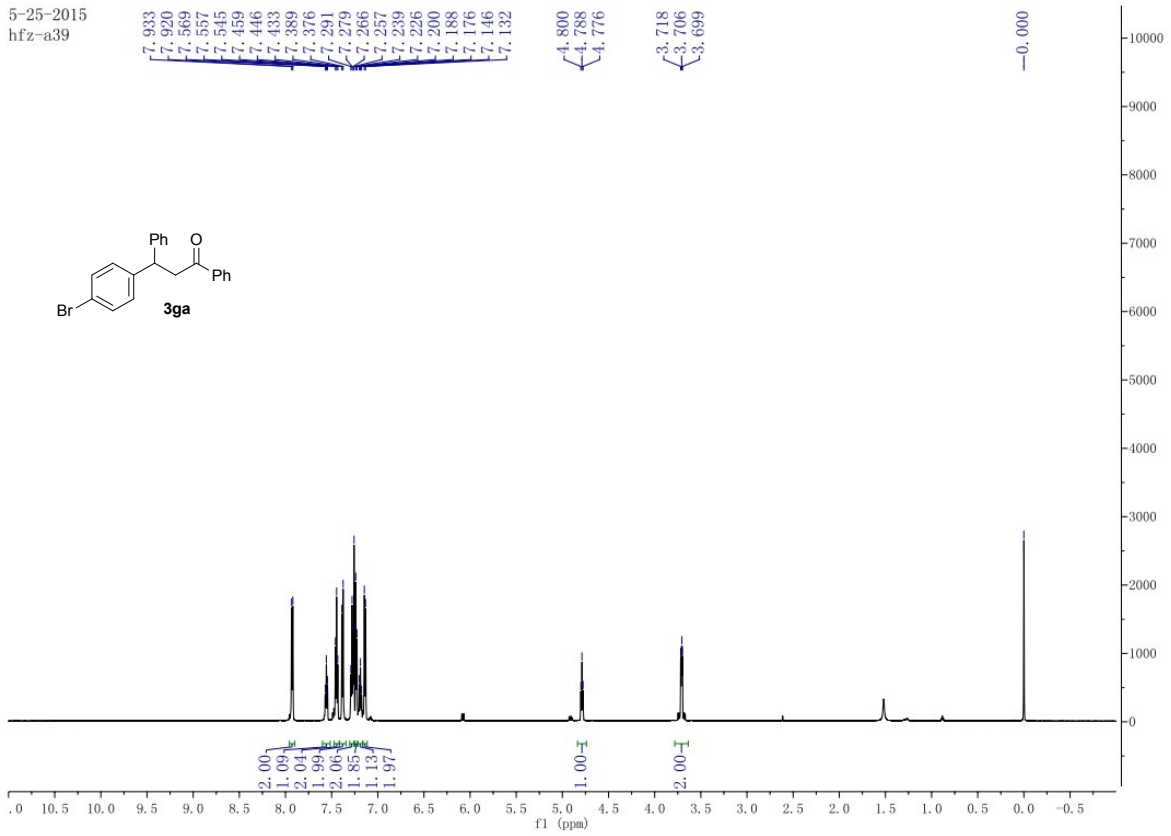

5-7-2015  
hfz-a23

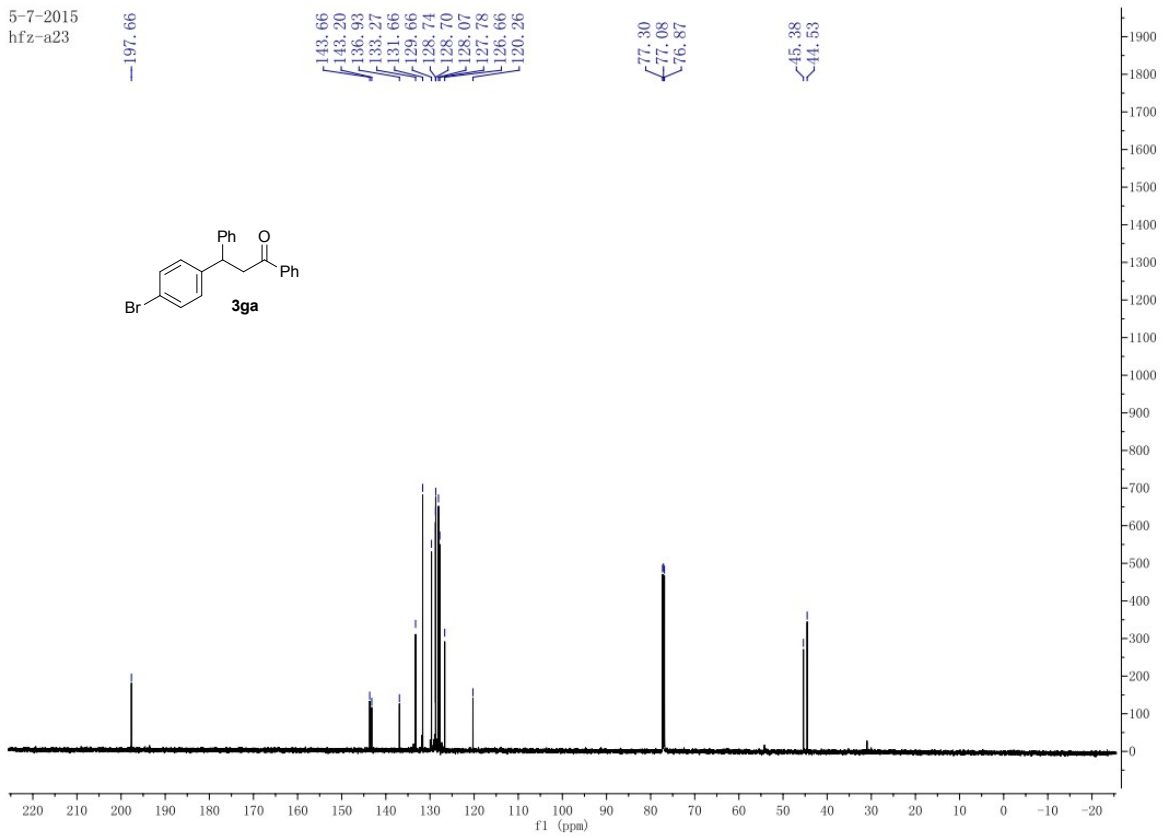



4-30-2015  
hfz-a12

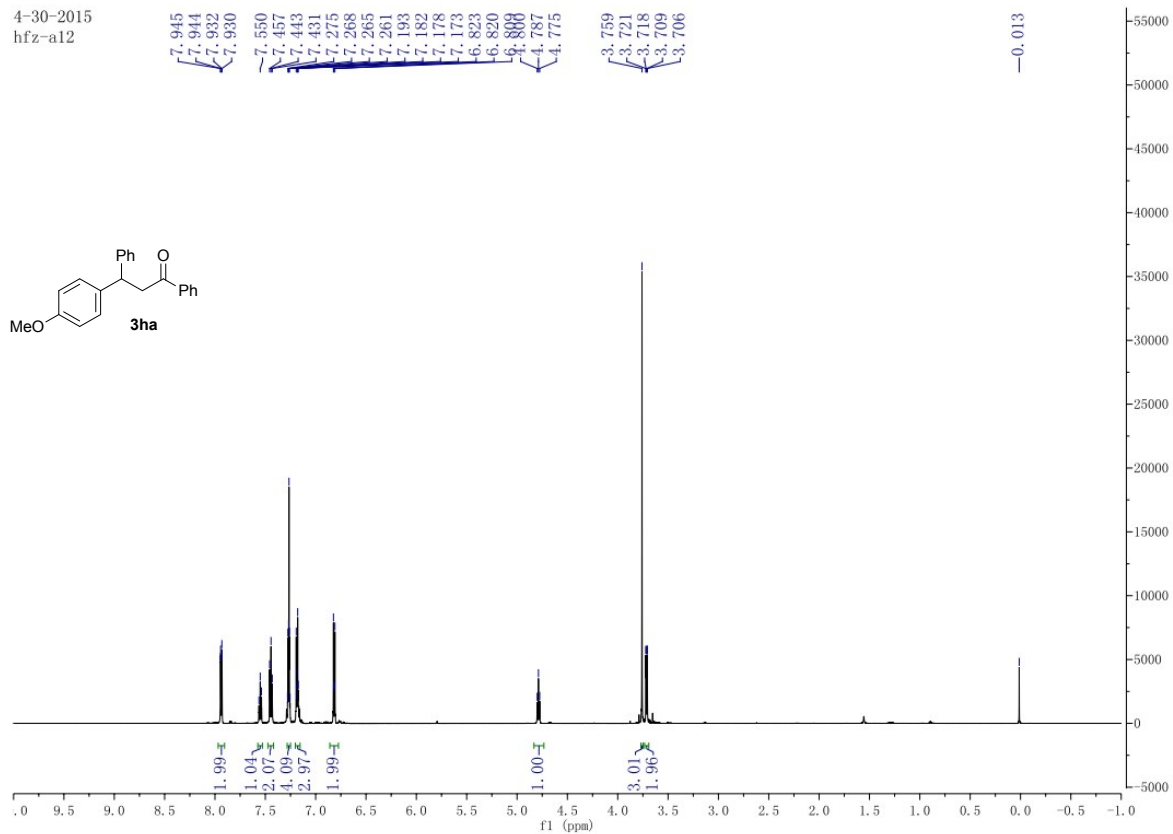

4-30-2015  
hfz-a13

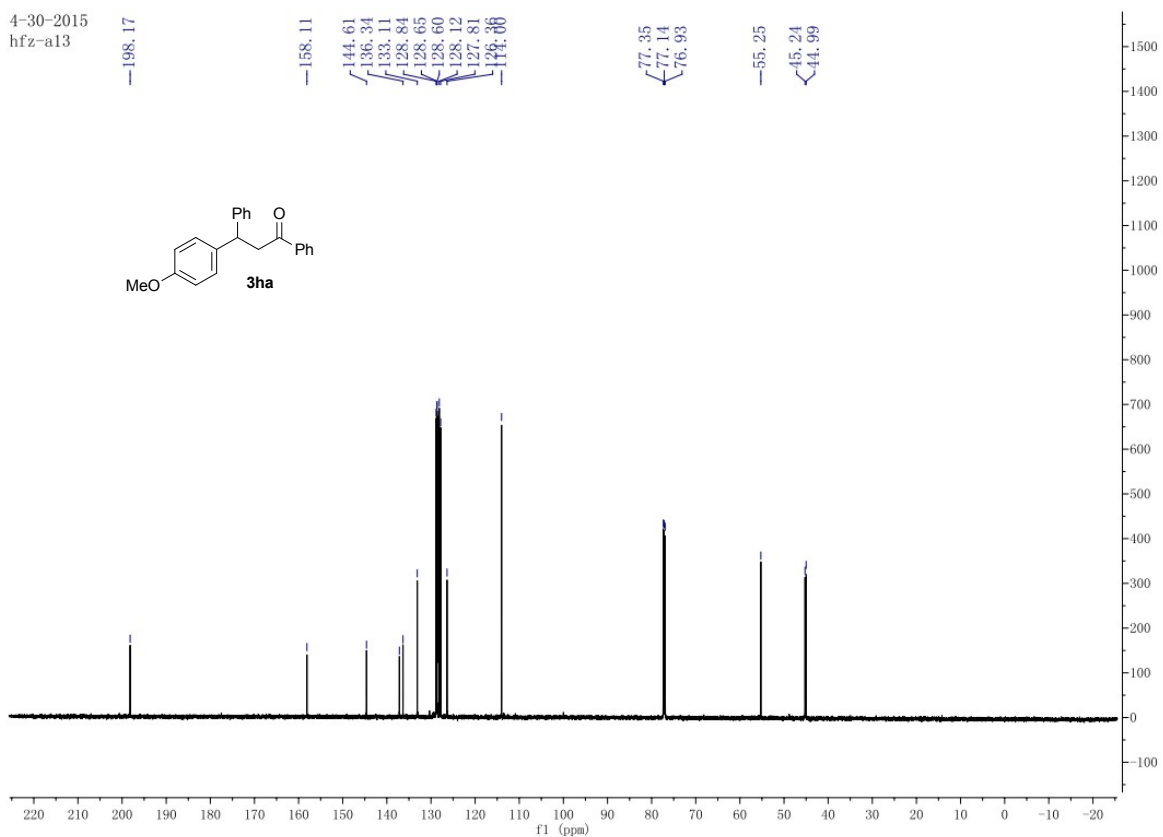

5-5-2015  
hfz-a17

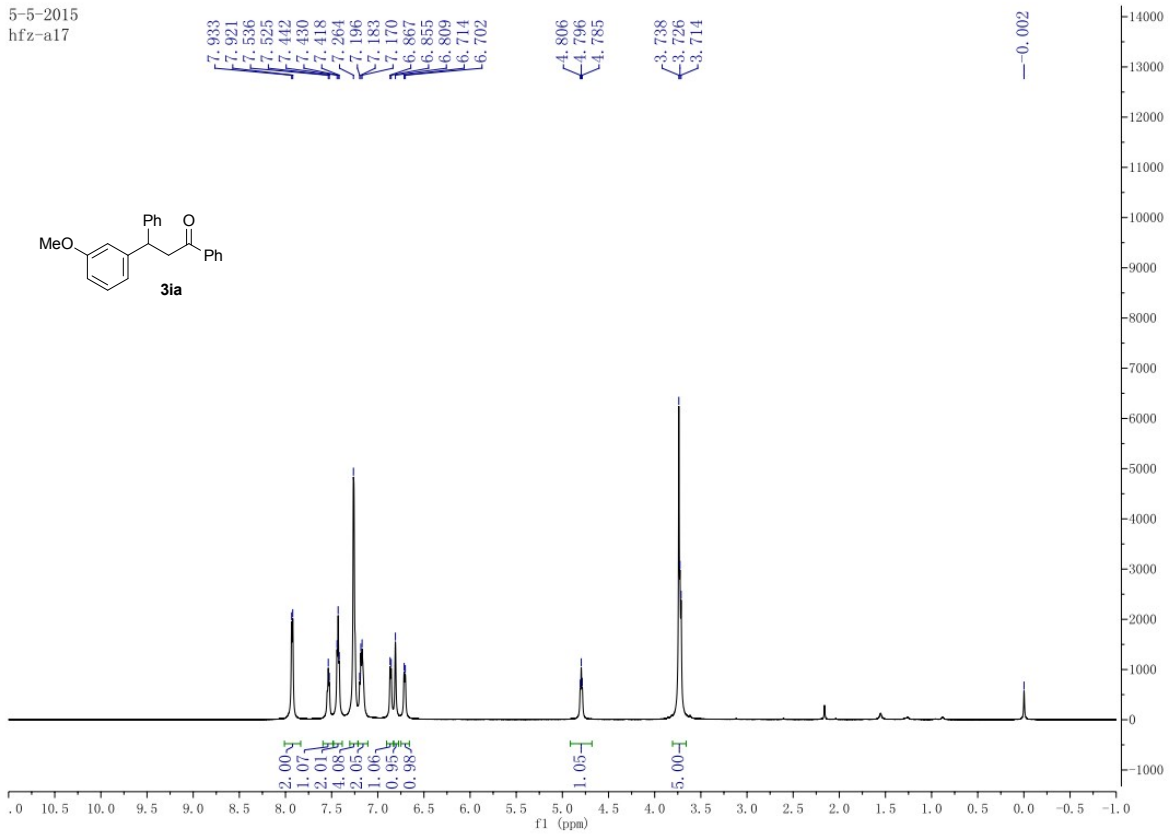

5-5-2015  
hfz-a19

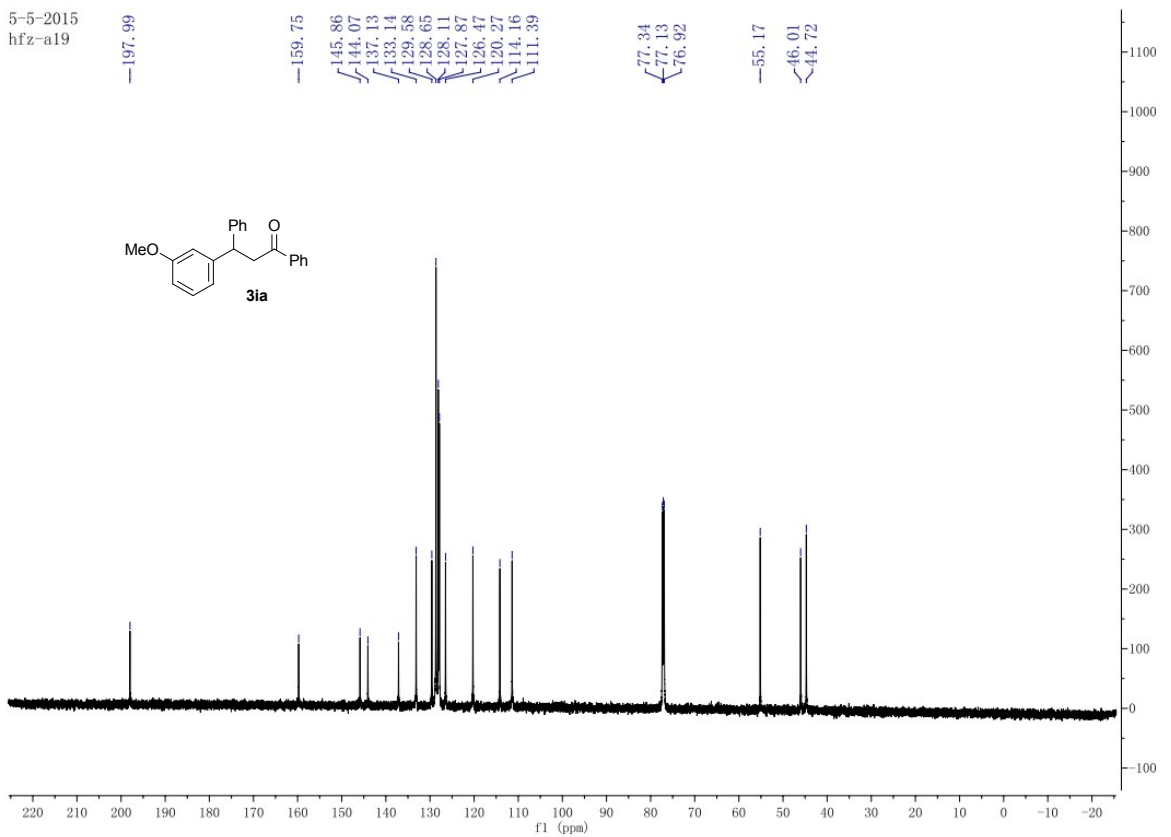

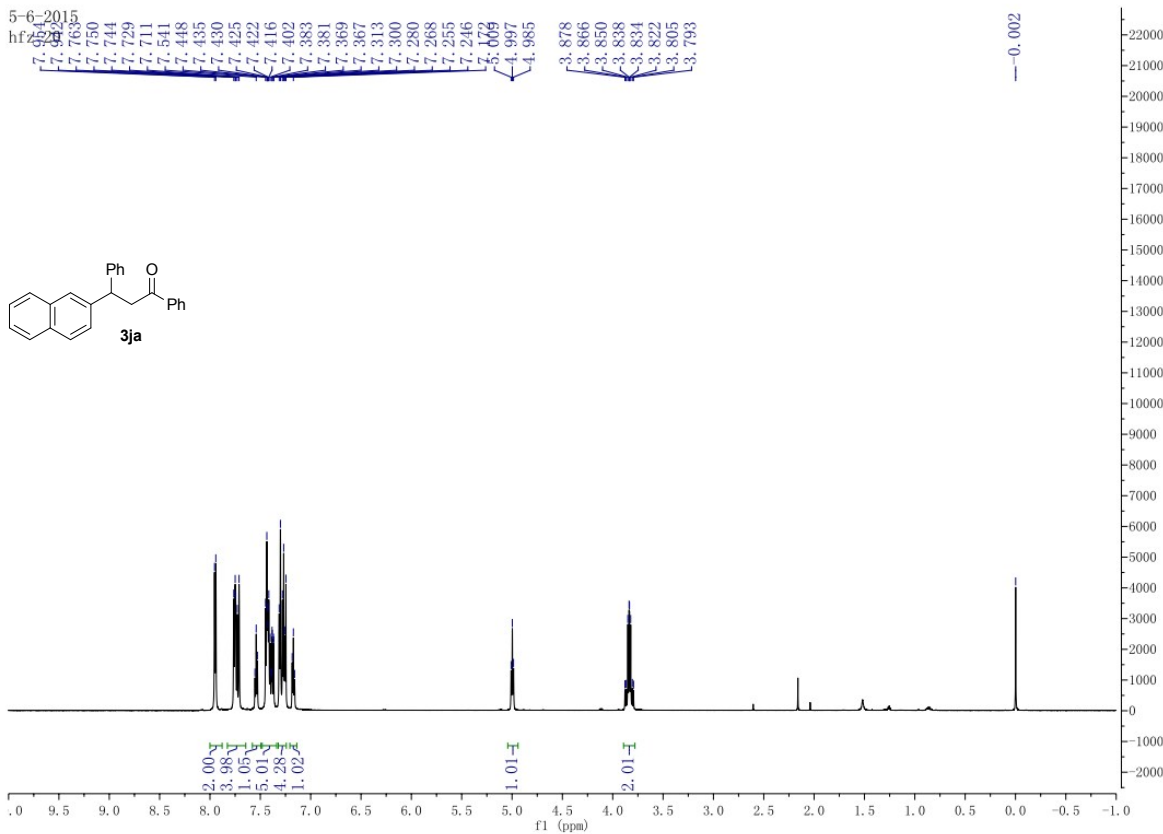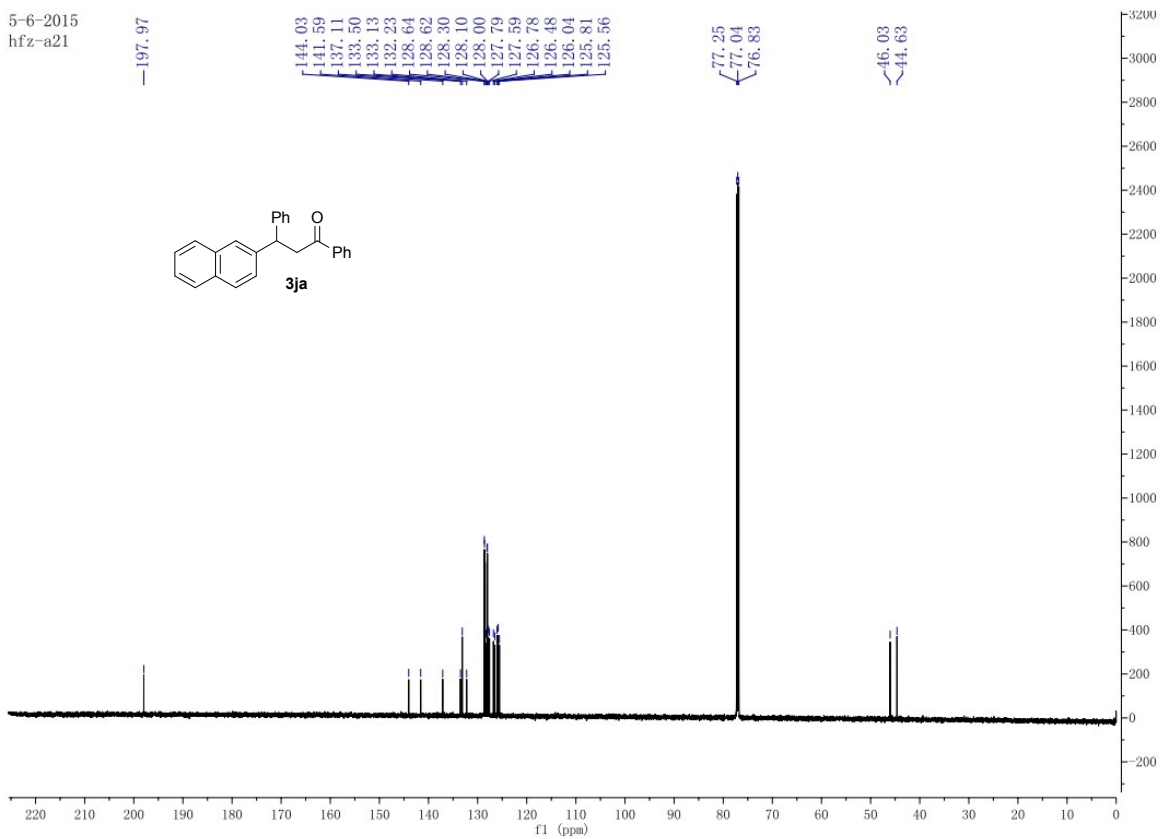

5-15-2015  
hfz-a31

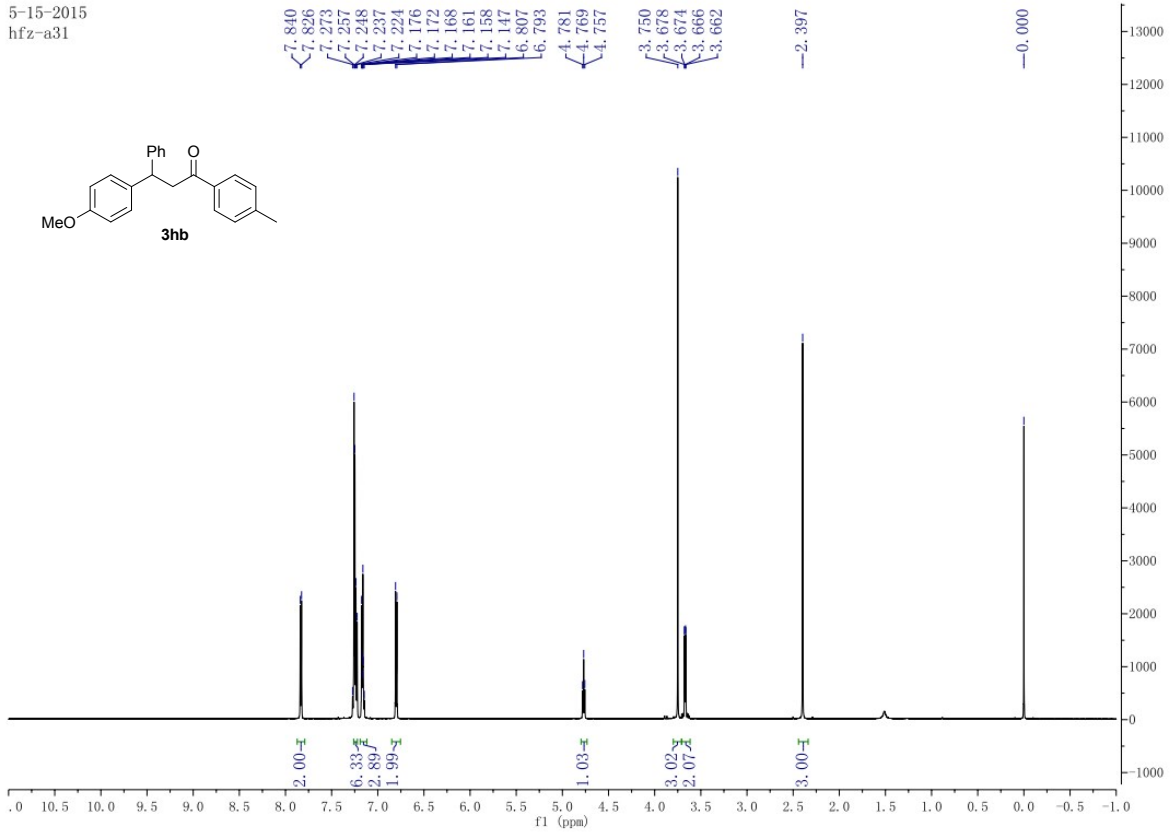

5-15-2015  
hfz-a32

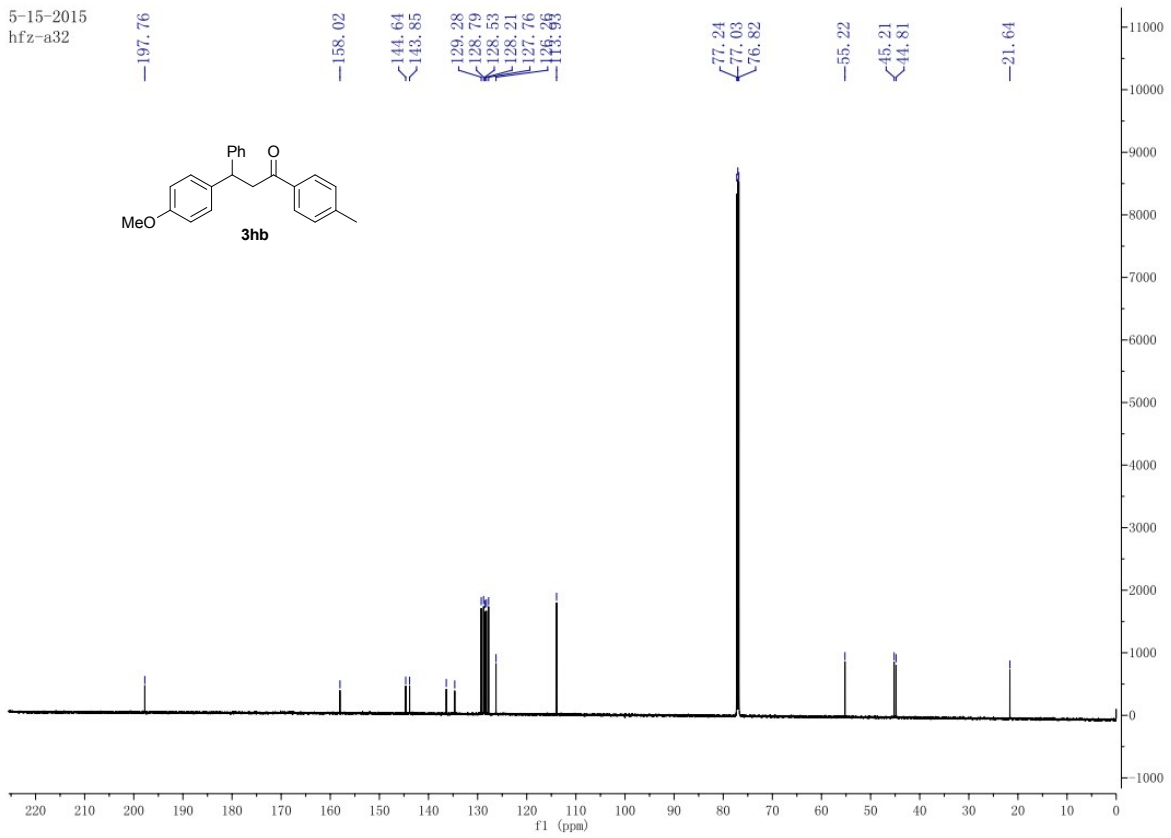

5-18-2015  
hfz-a33

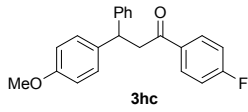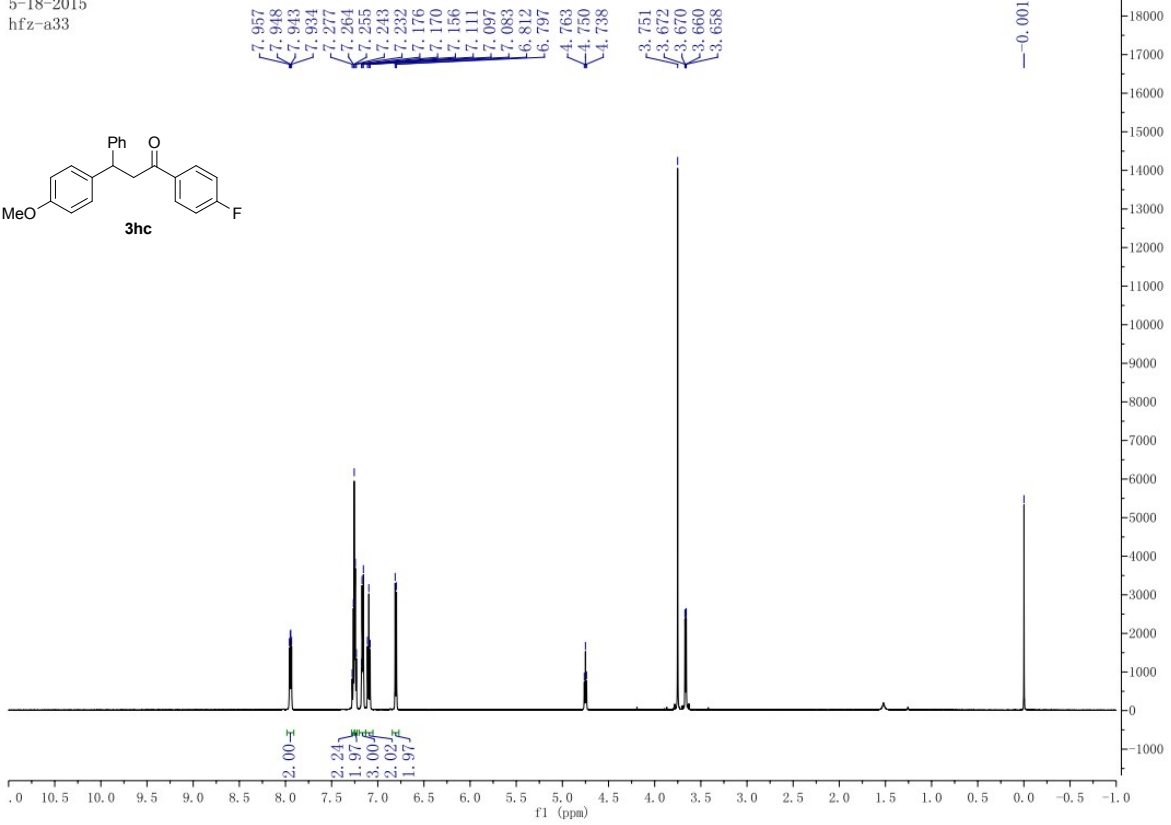

5-18-2015  
hfz-a34

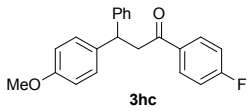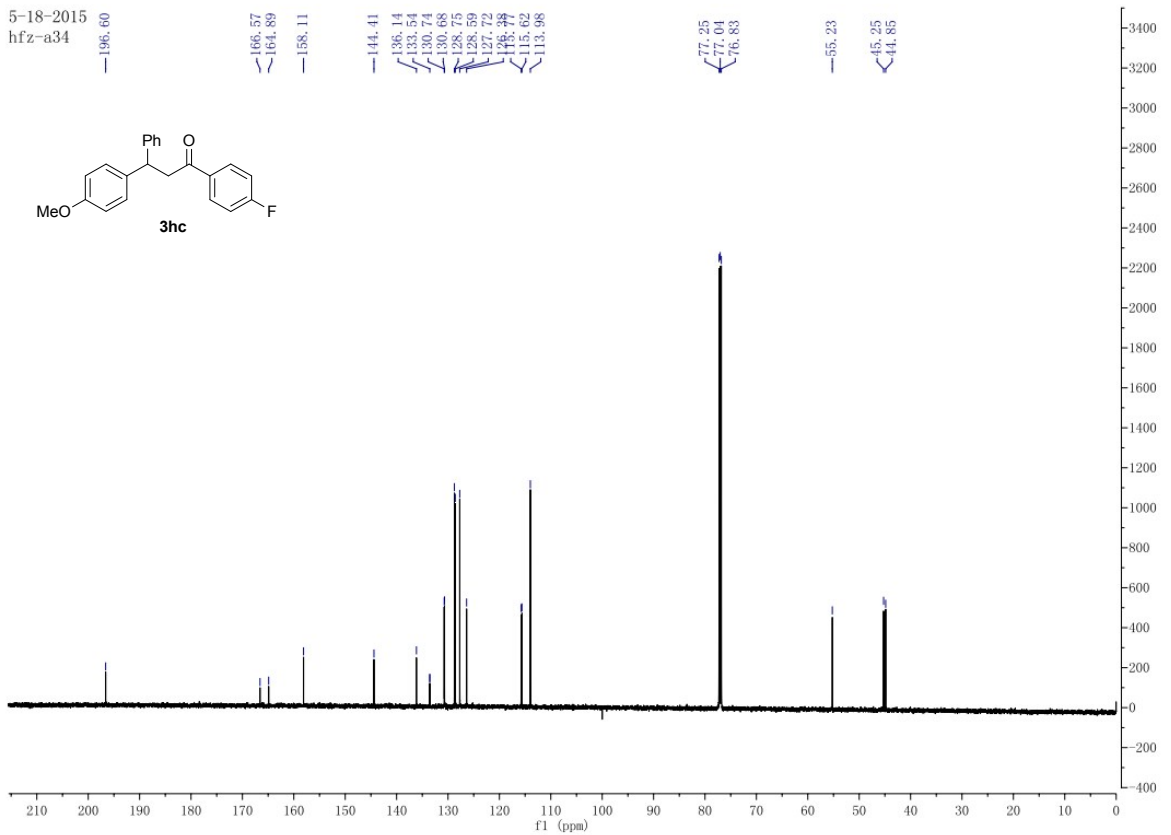

5-21-2015  
hfz-a36

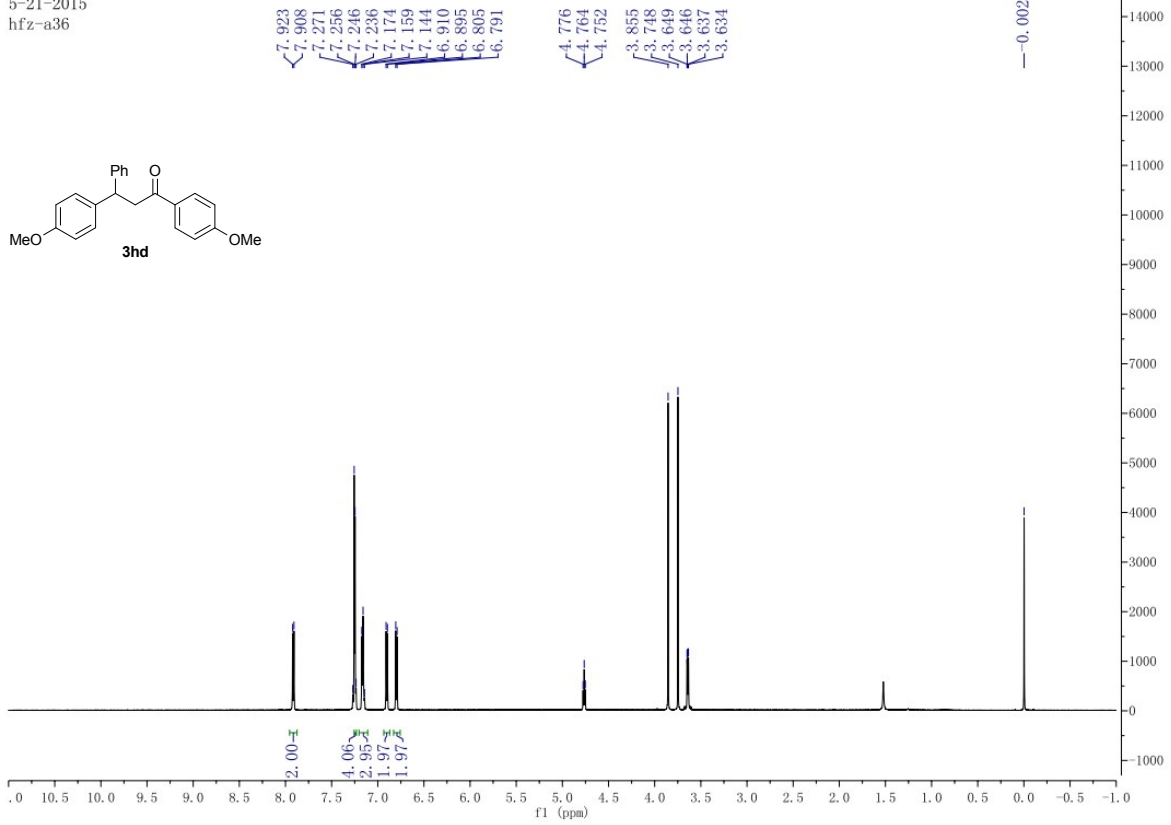

5-21-2015  
hfz-a38

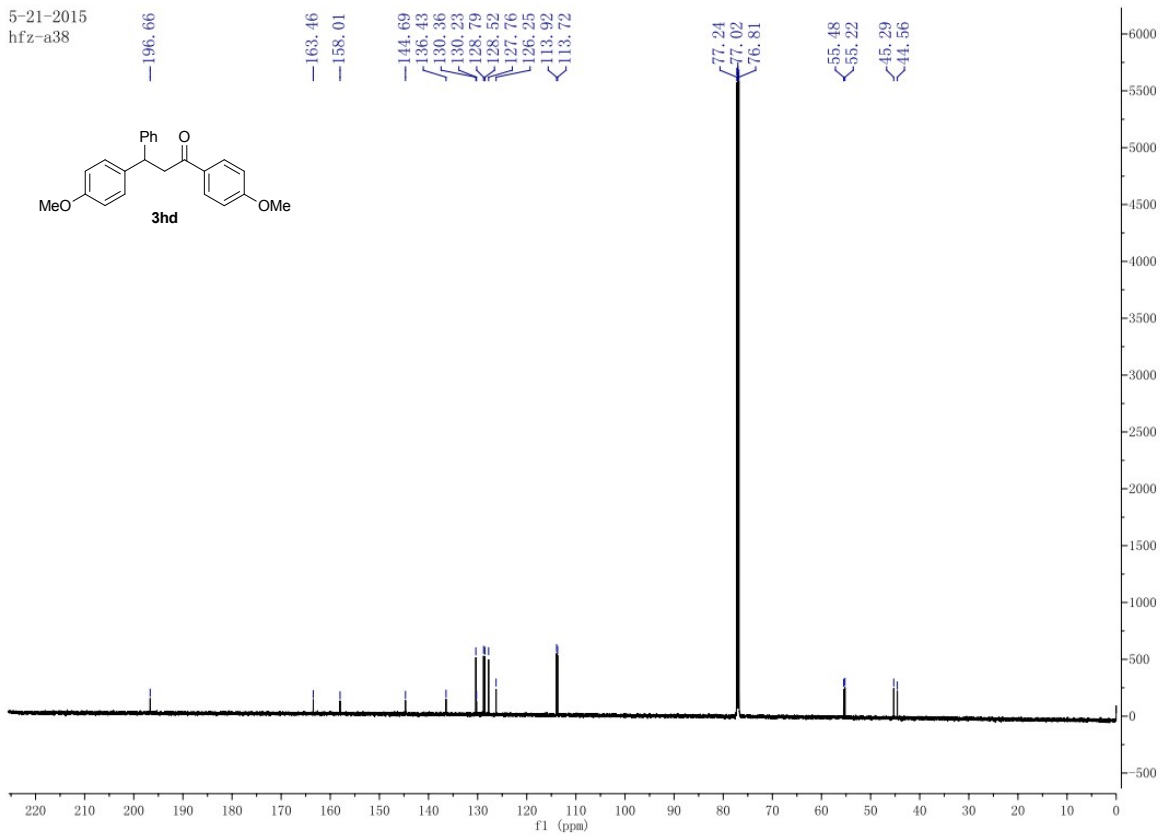

6-1-2015  
hfz-a41

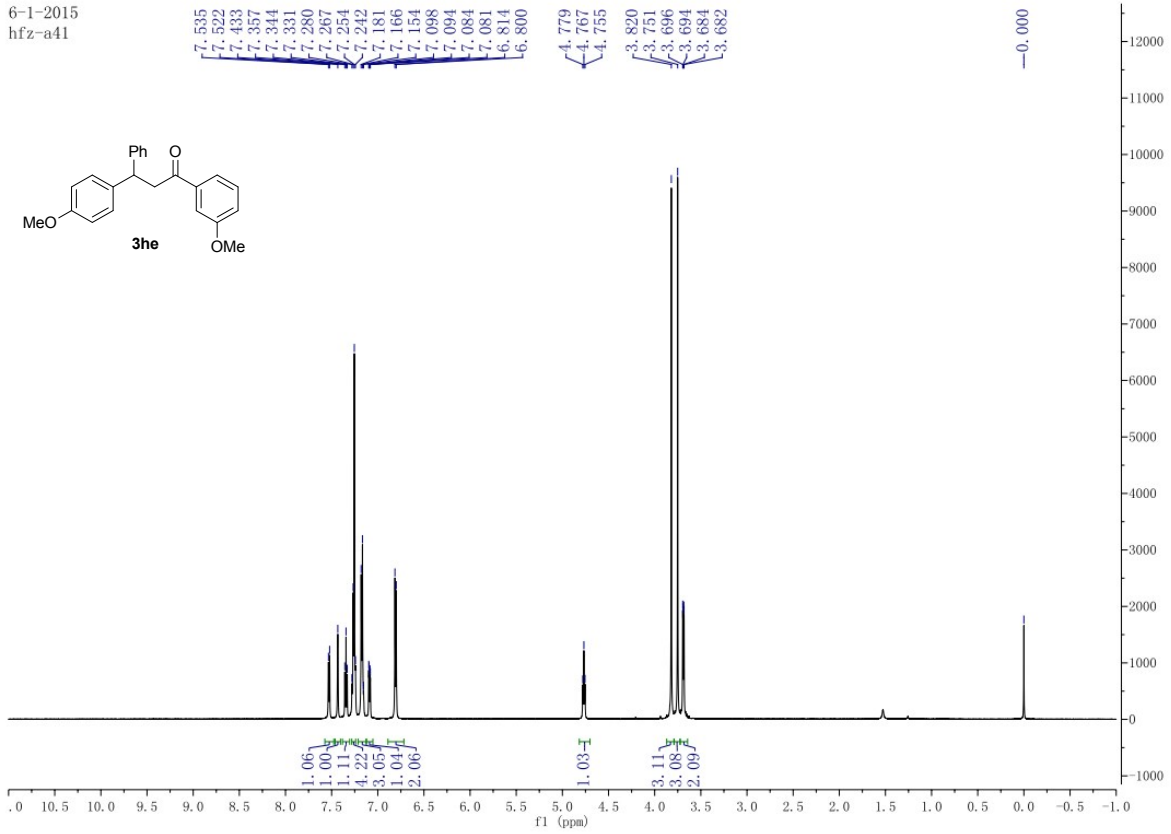

6-1-2015  
hfz-a43

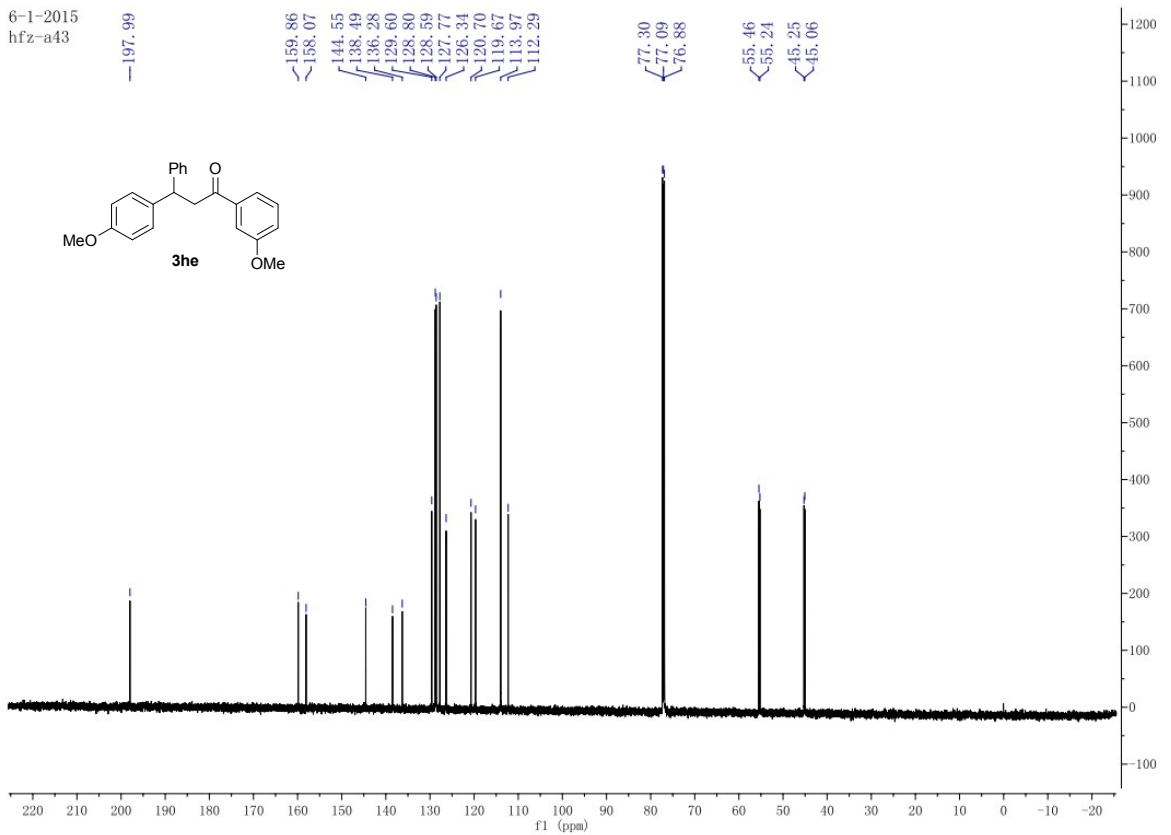

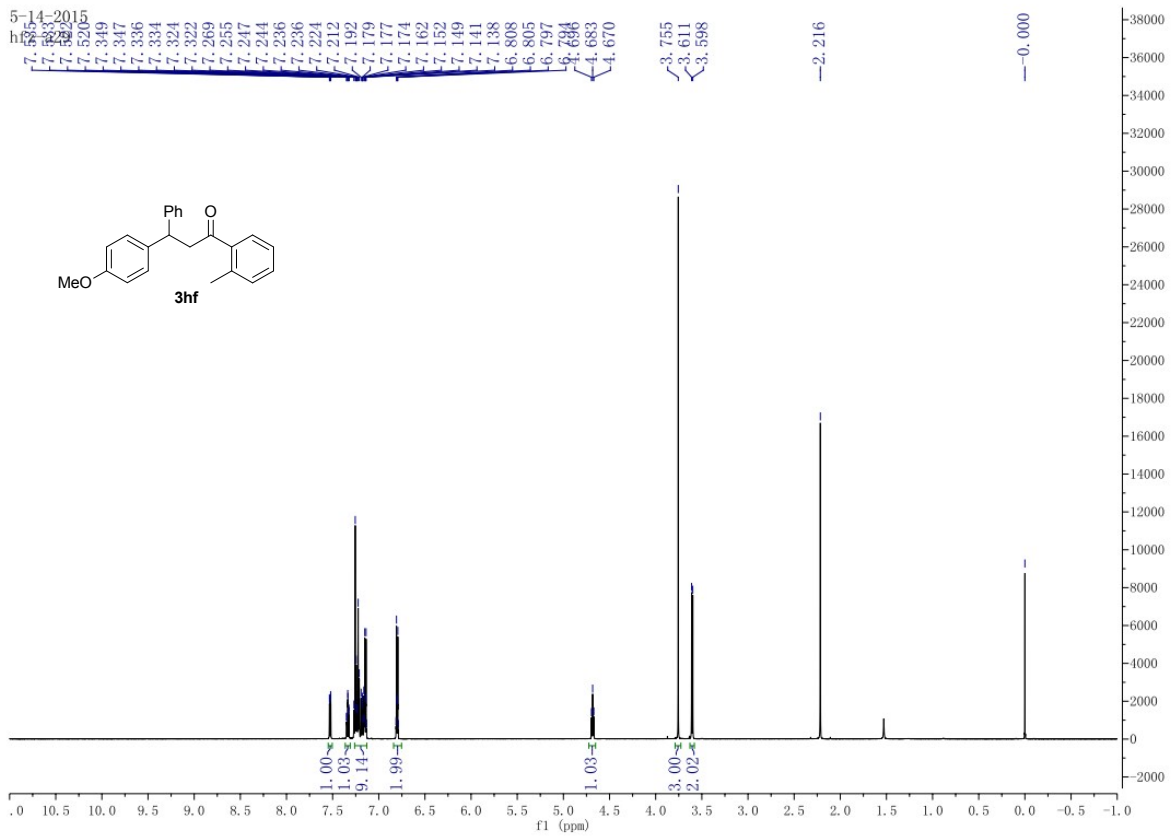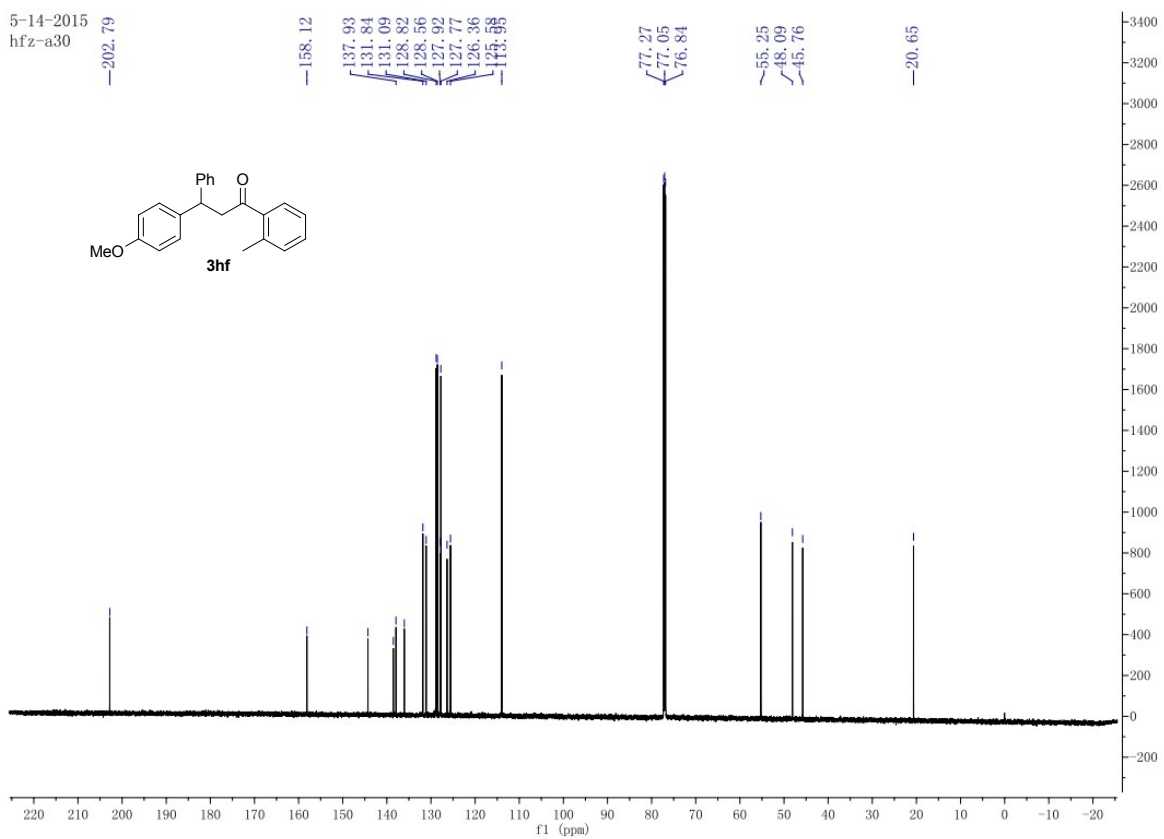



5-11-2015  
HFZ-A25

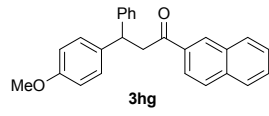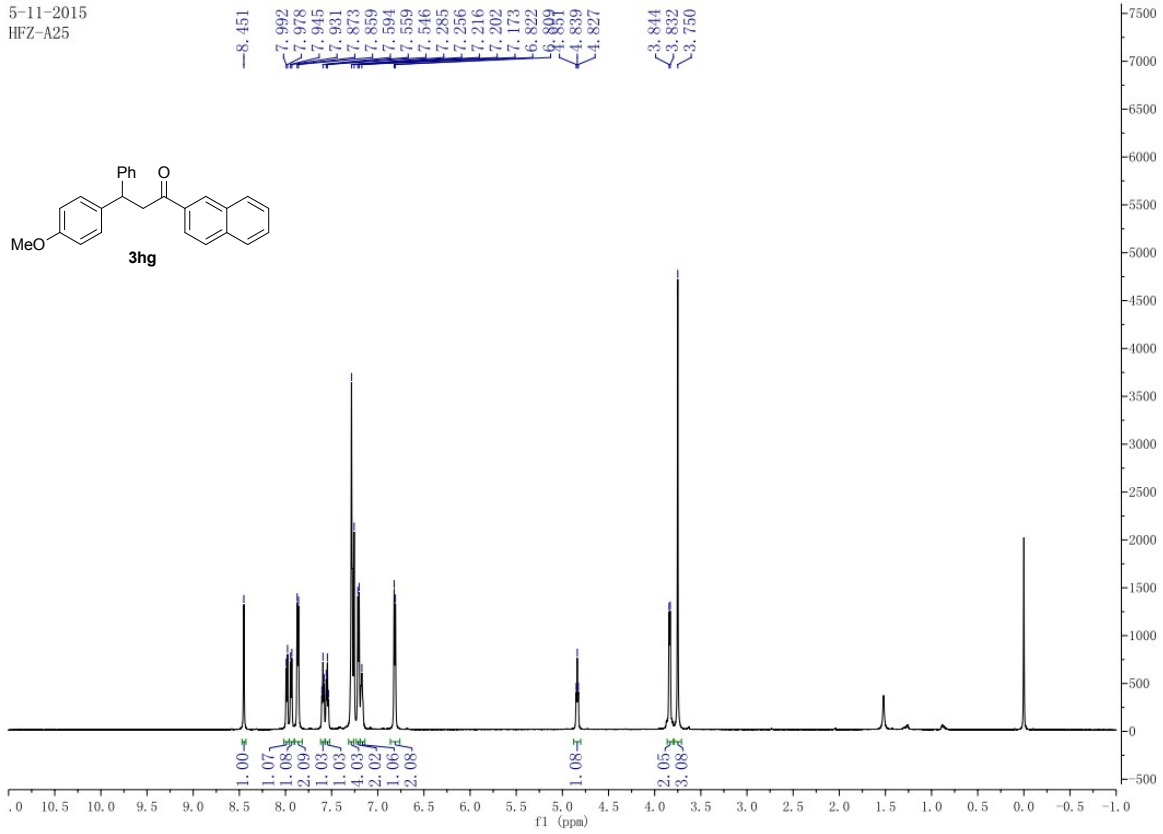

5-11-2015  
hfz-a26

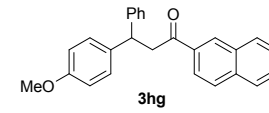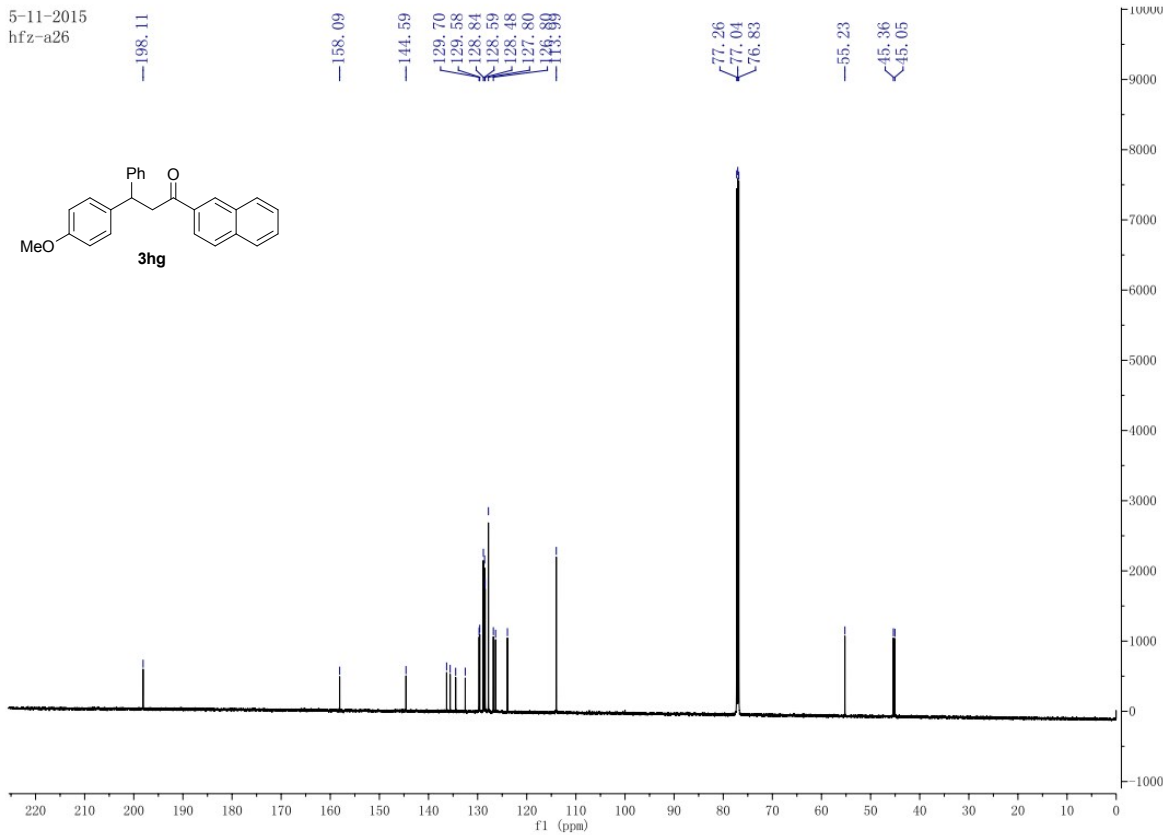

6-2-2015  
hfz-a45

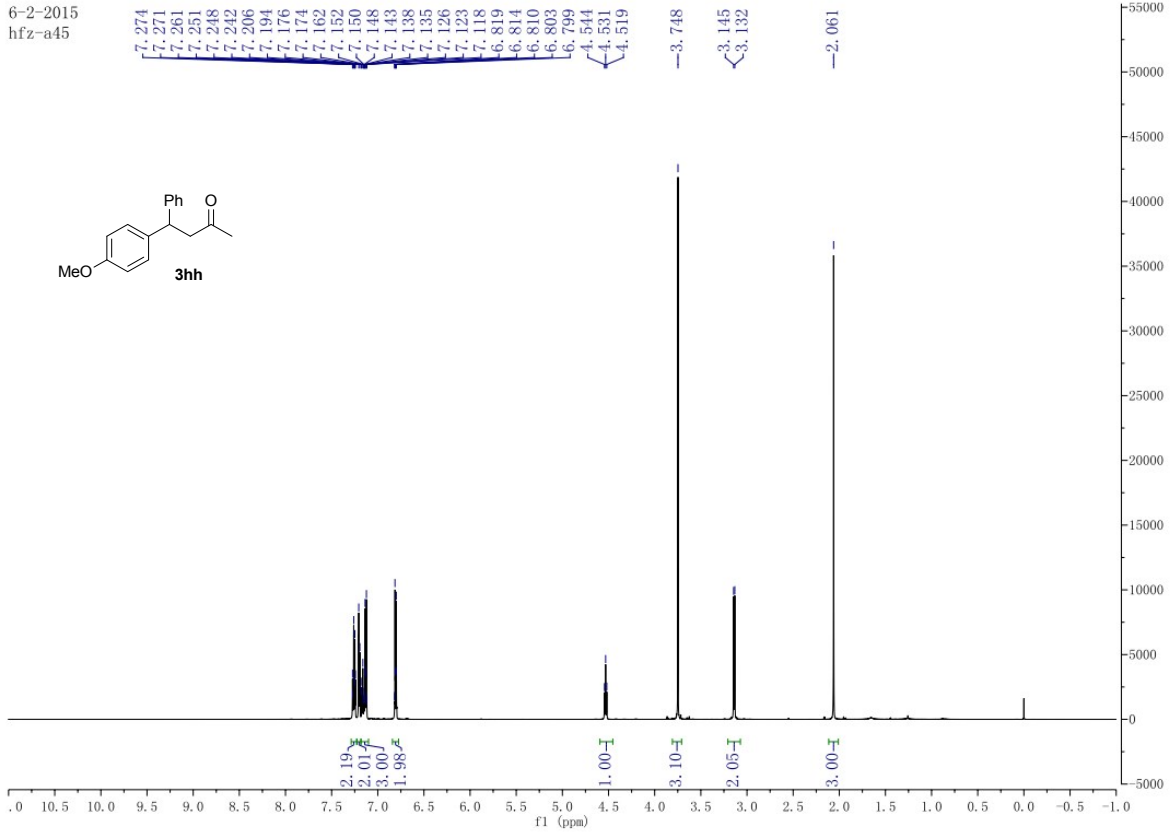

6-3-2015  
hfz-a47

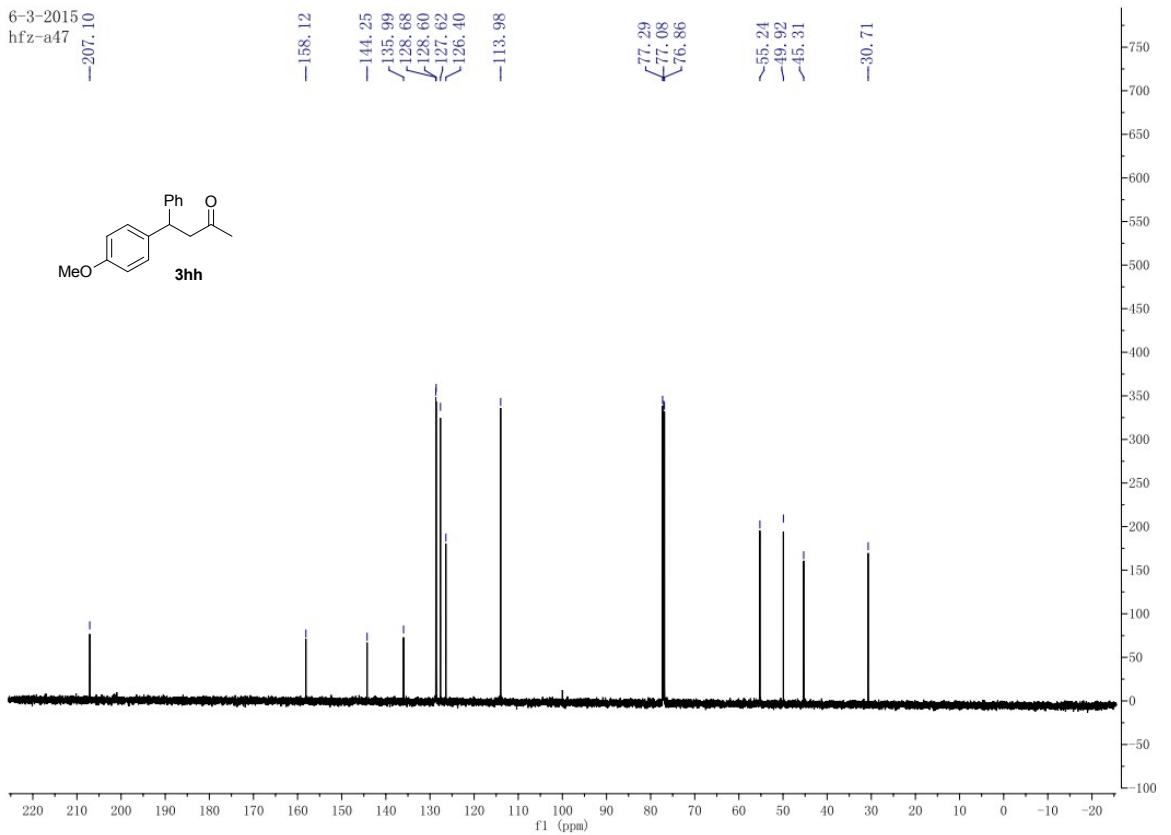

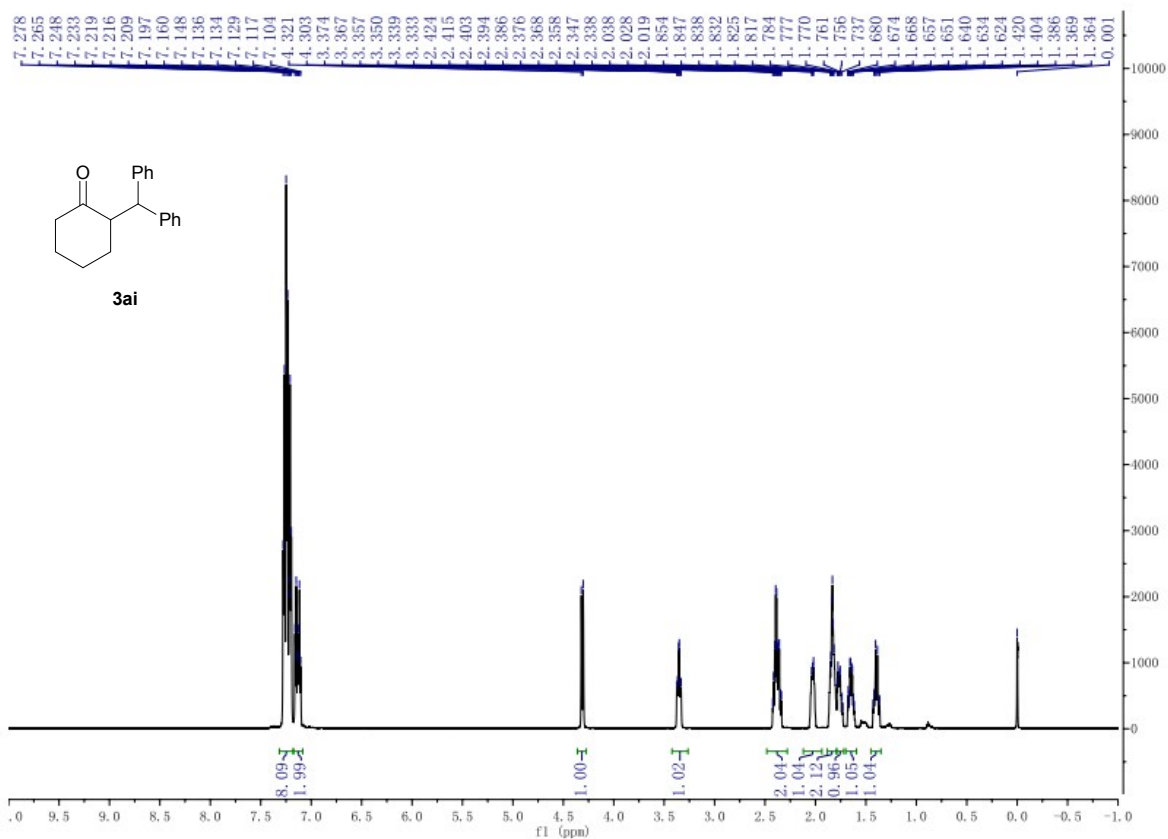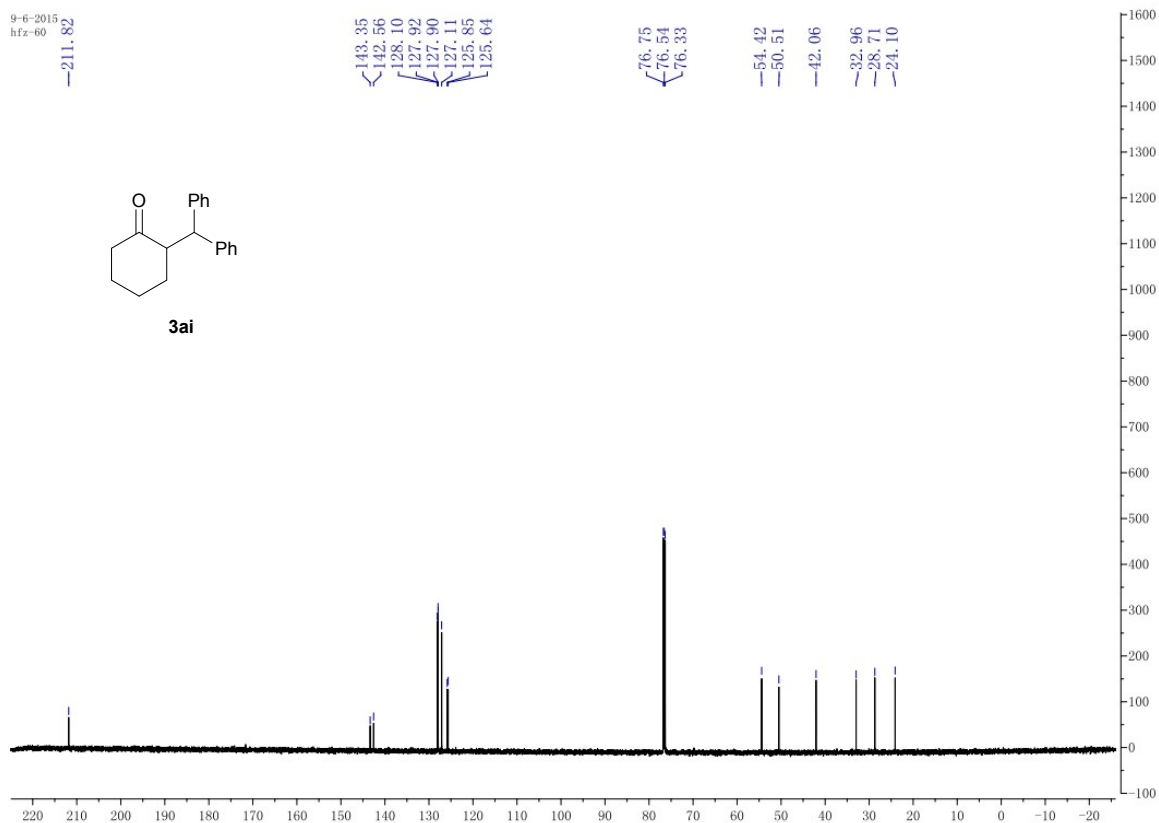

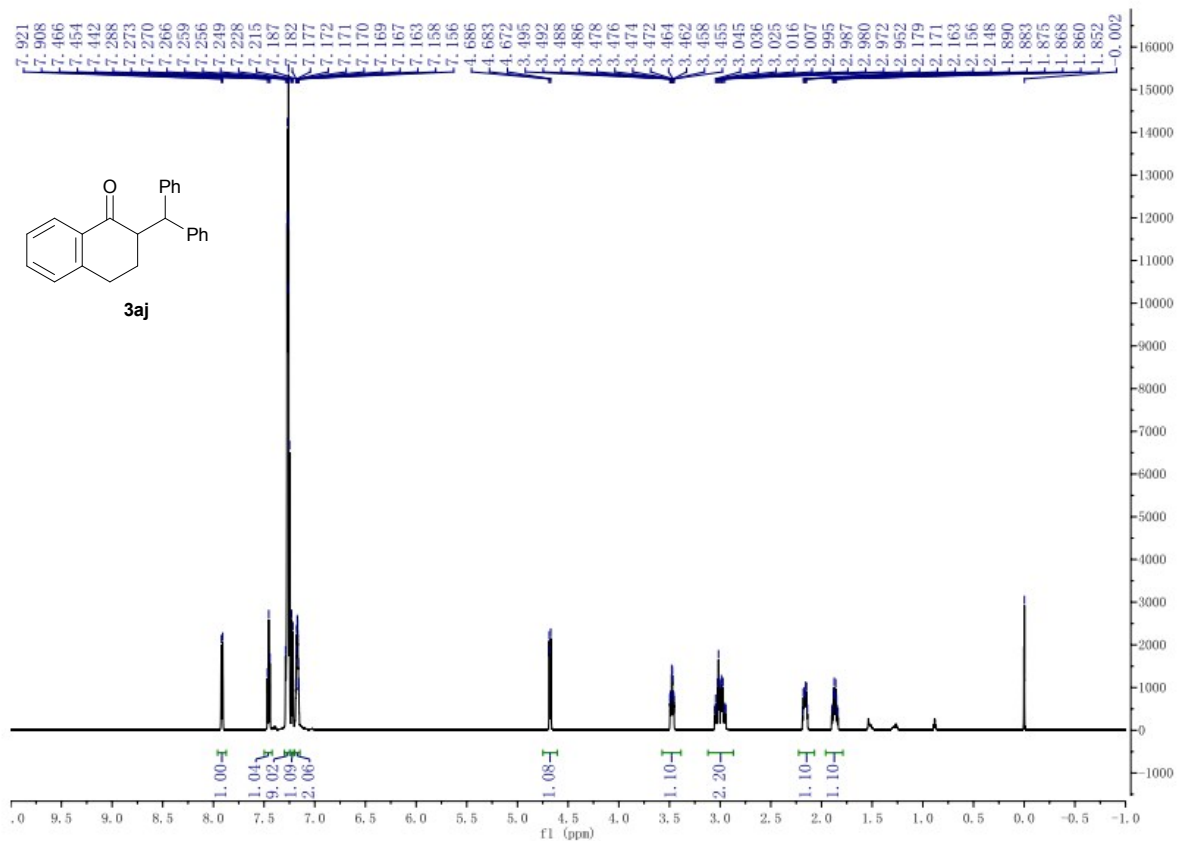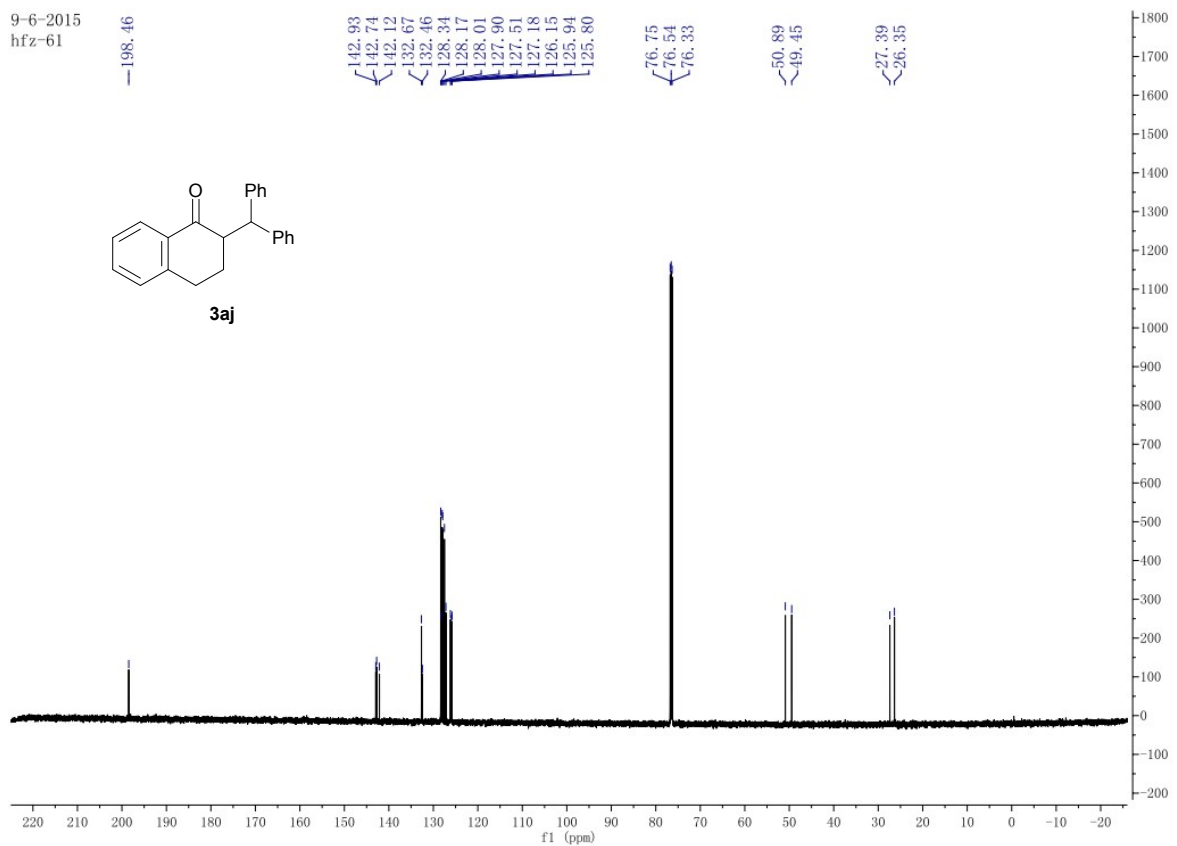

9-8-2015  
hfz-64

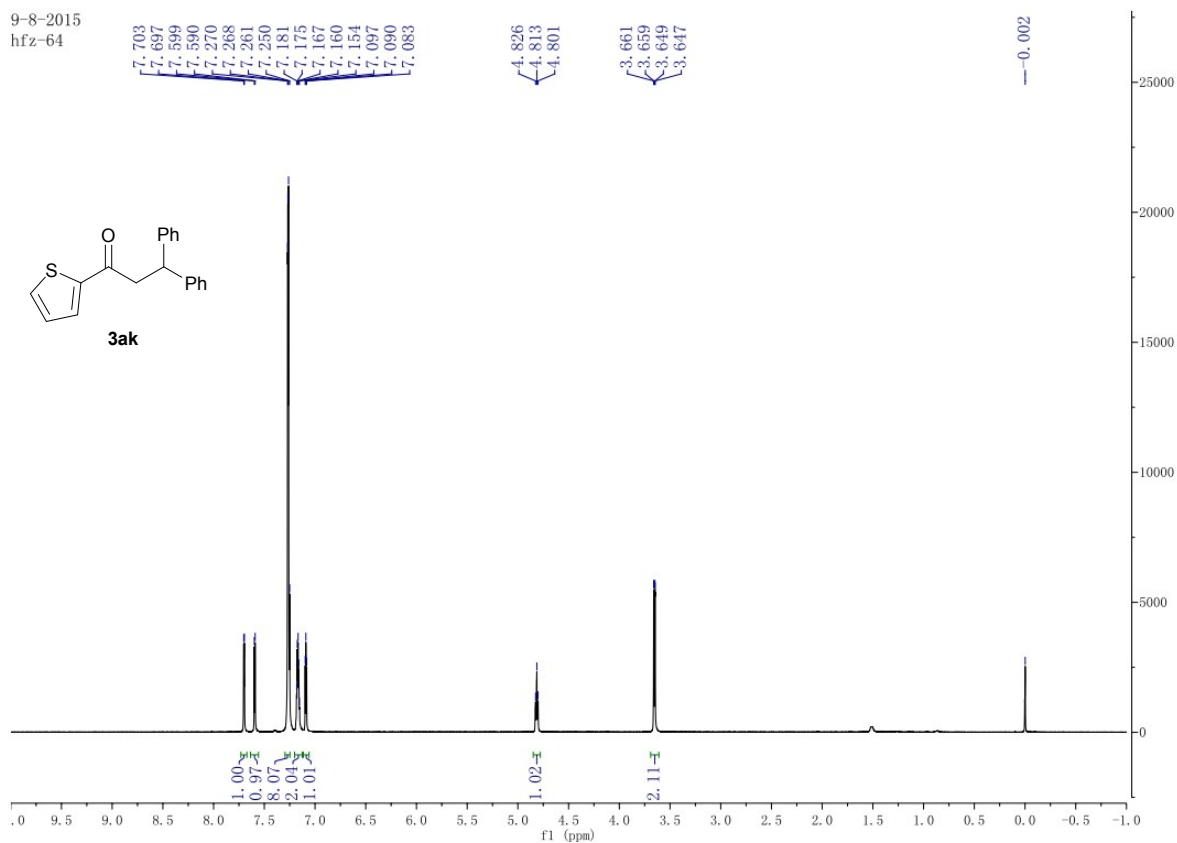

9-8-2015  
hfz-64

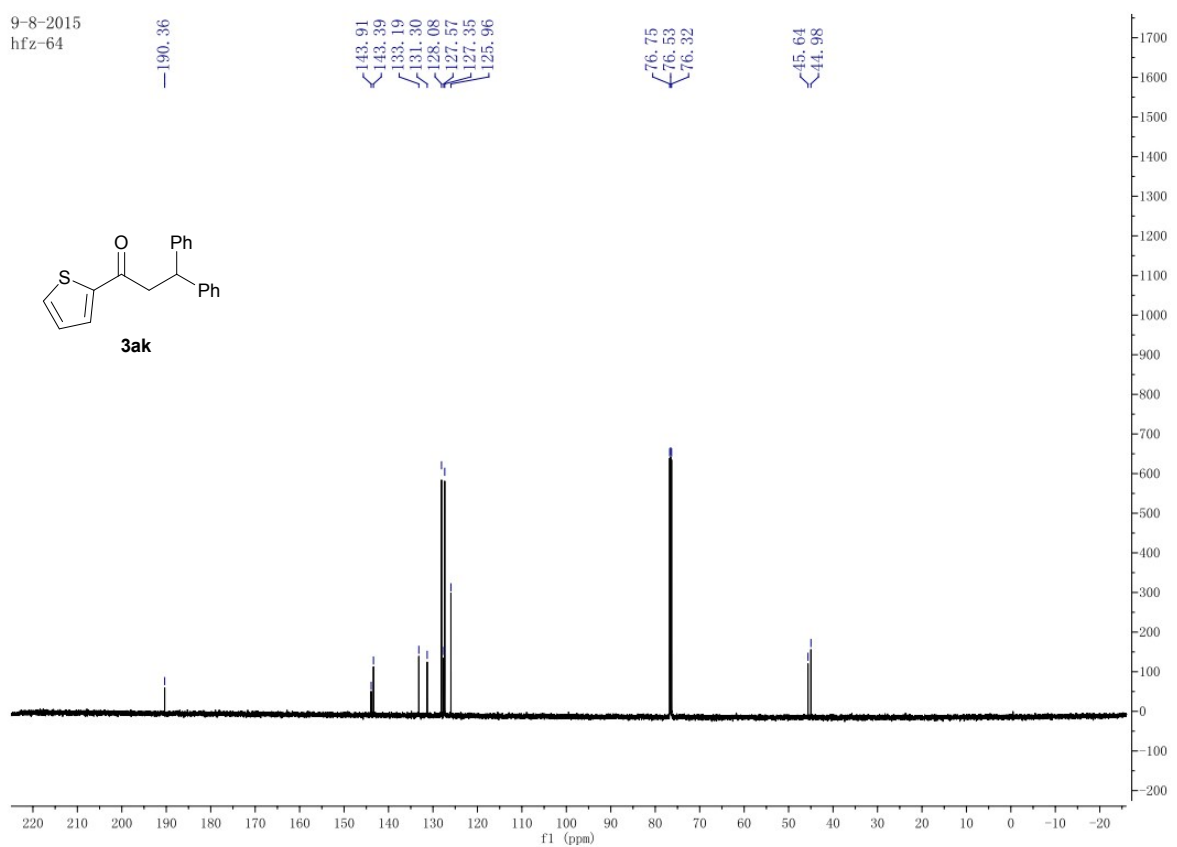

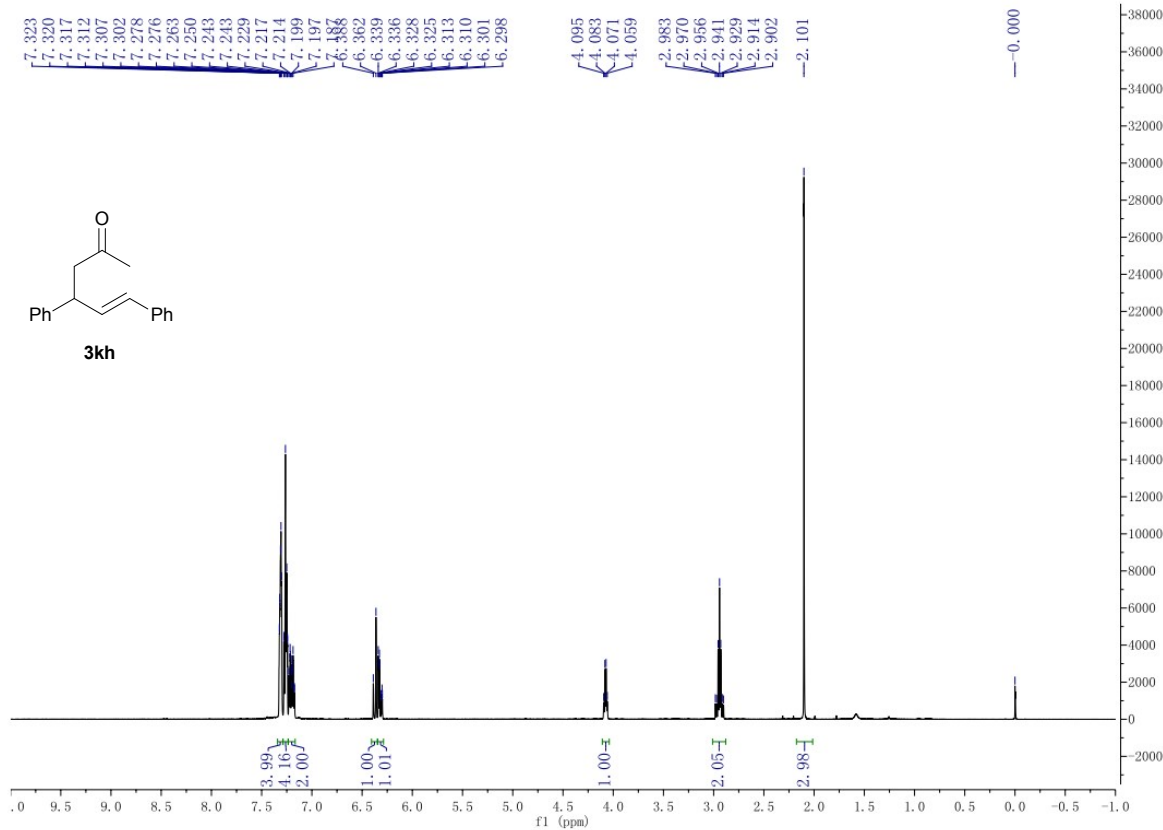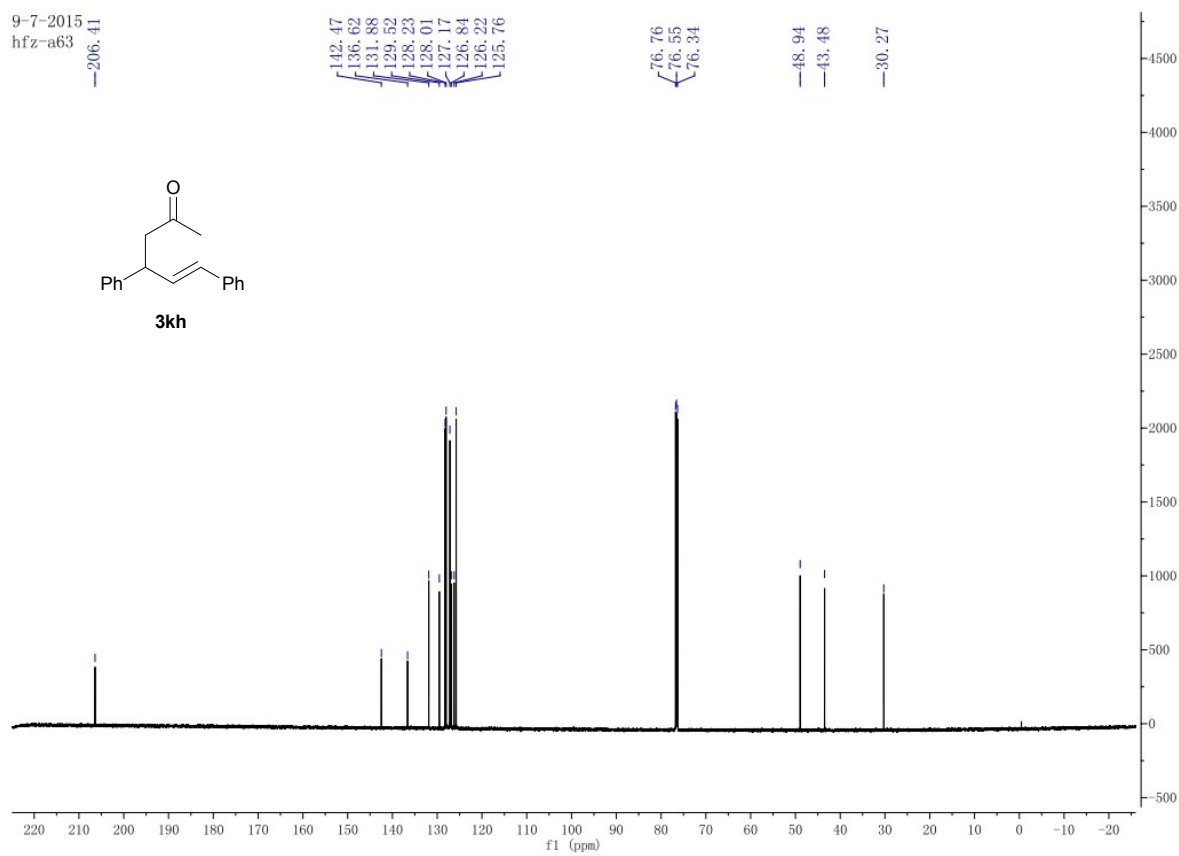

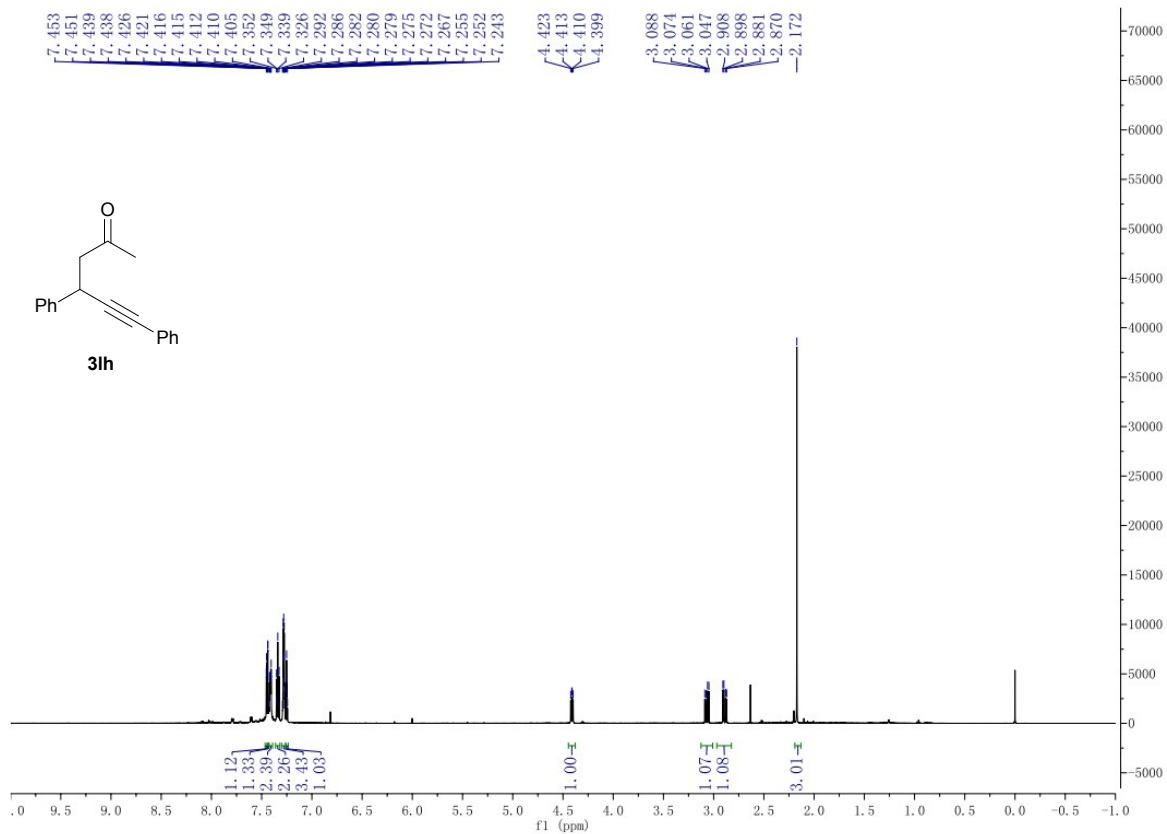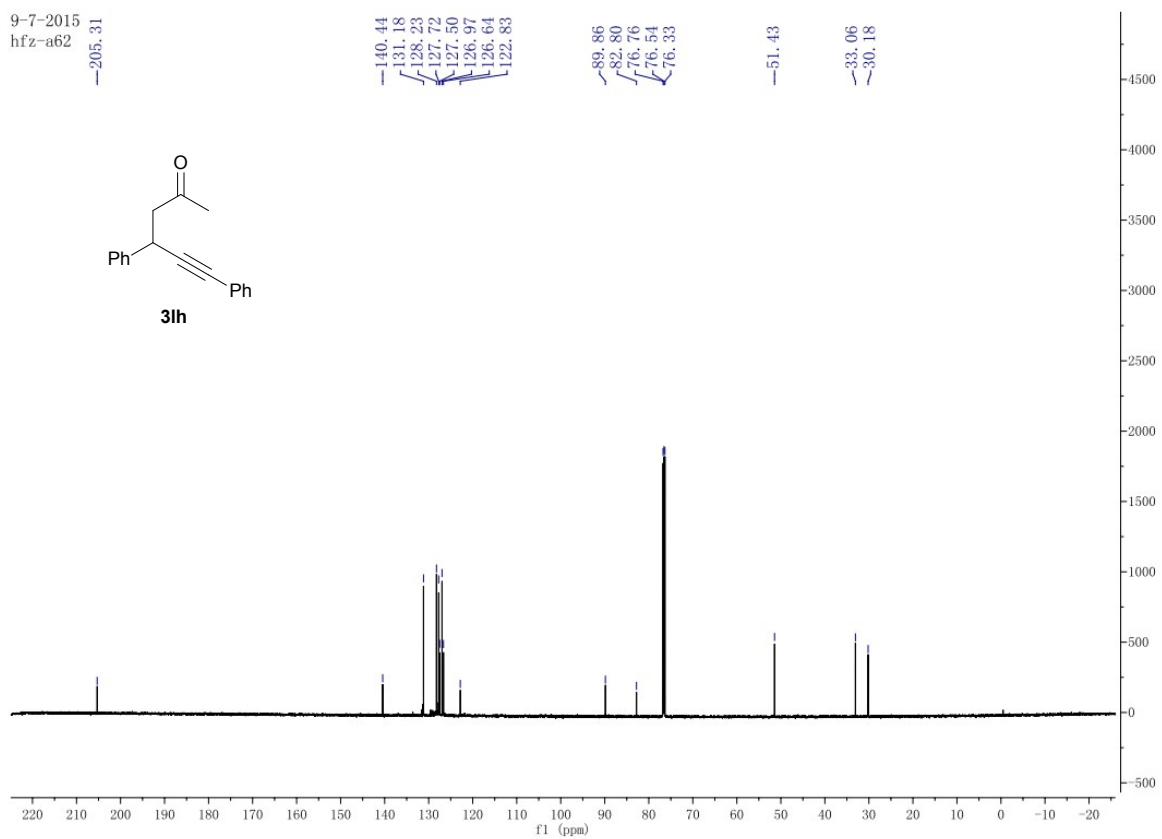

Supplement: c5ob01730k1.pdf [file c5ob01730k1.pdf]
